# Supplementary material for: Signer-Independent Arabic Sign Language Recognition System Using Deep Learning Model
Source: MDPI journal article supplement (doi:10.3390/s23167156), 2023-08-14
Supplement: s1 [file s1]

### Model: MobileNetV2-LSTM-SelfMLP (q1) on Raw Dataset

The accuracy and loss curves during the training of **MobileNetV2-LSTM-SelfMLP (q1)** on Raw Dataset is given Table S1:

Table S1: Accuracy and Loss curves of MobileNetV2-LSTM-SelfMLP (q1) training on raw dataset

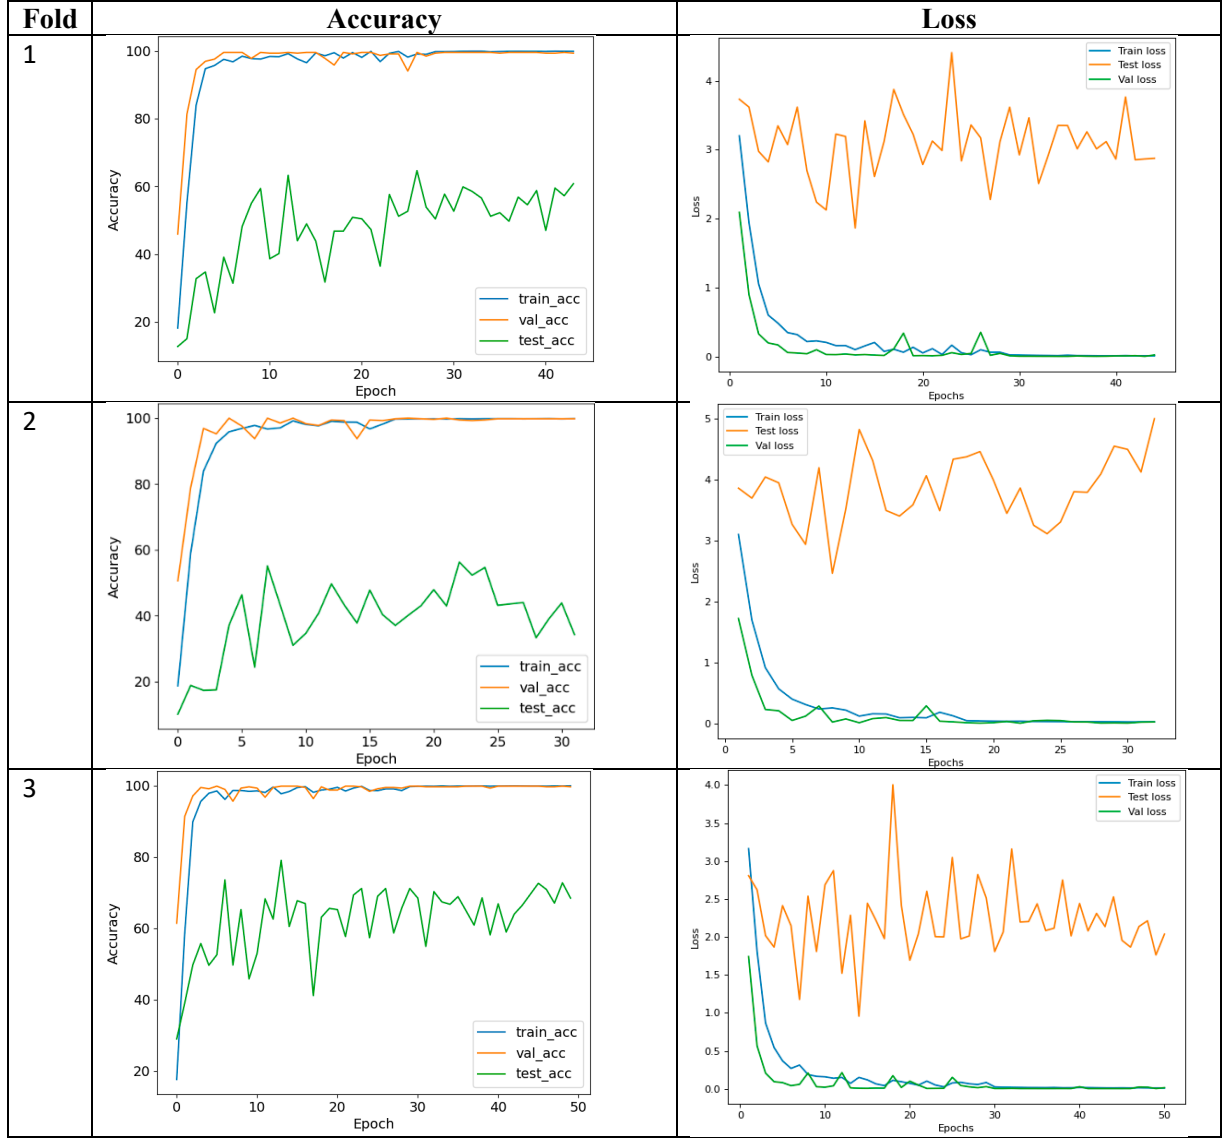

4

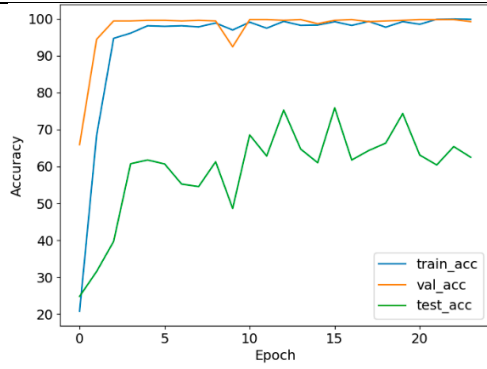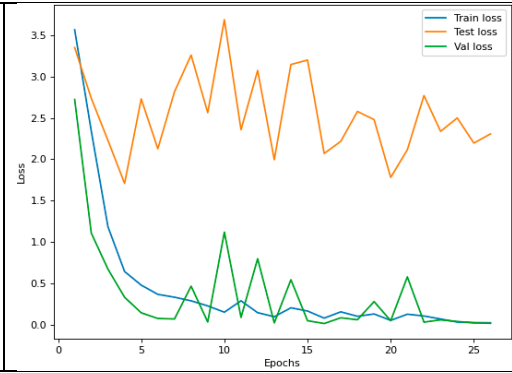

**Confusion Matrix:** The Confusion Matrix of MobileNetV2-LSTM-SelfMLP (q1) on Raw Dataset is given below:

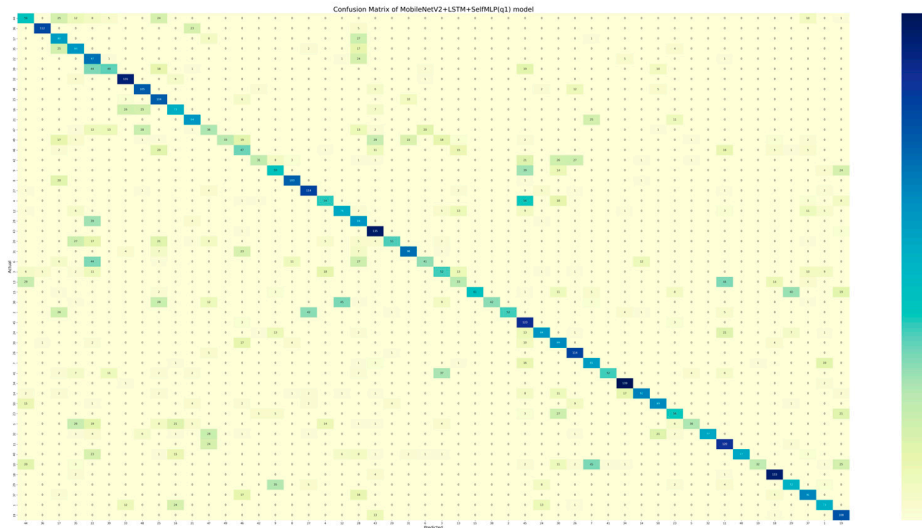

Figure S1: Confusion Matrix of MobileNetV2-LSTM-SelfMLP (q1) on Raw Dataset

**ROC Curve:** The ROC Curve of MobileNetV2-LSTM-SelfMLP (q1) on Raw Dataset is given below:

## ROC curve of MobileNetV2-LSTM-SelfMLP(q1)

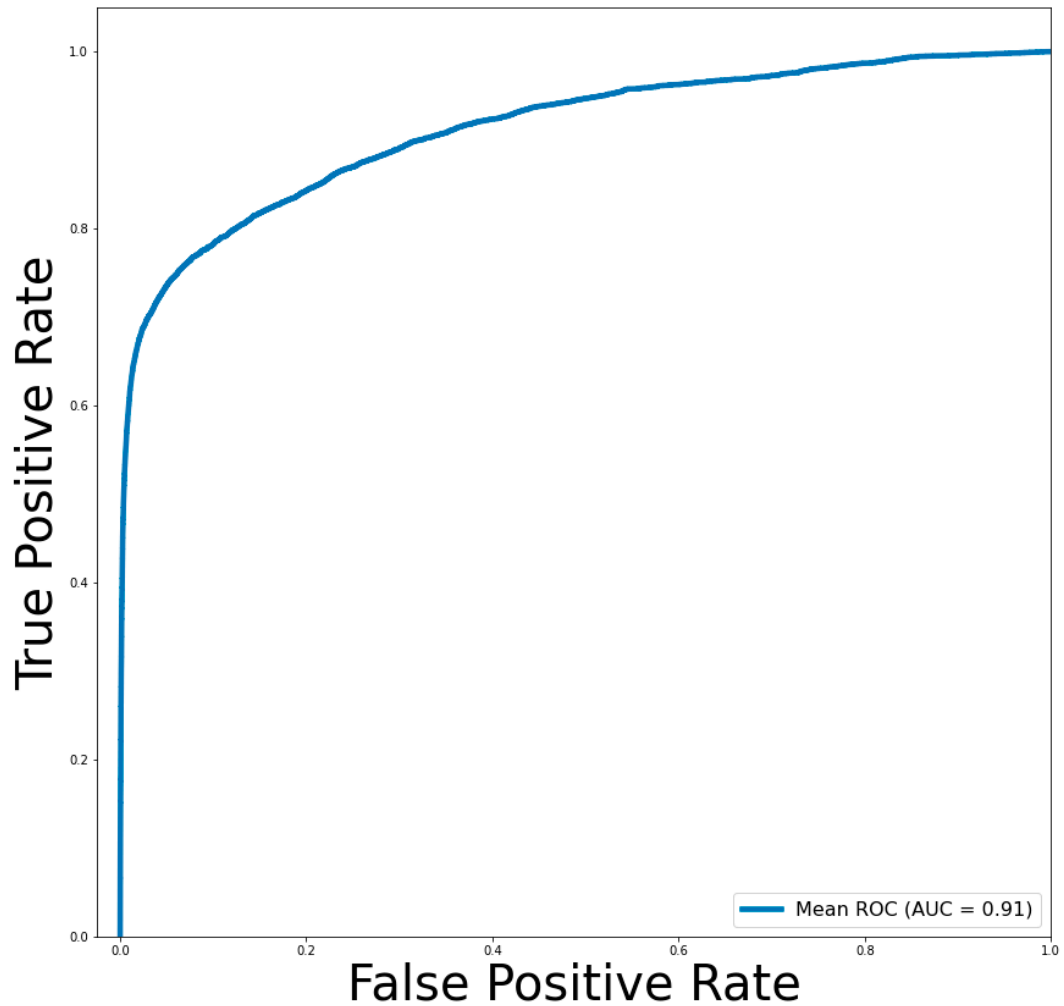

Figure S2: ROC Curve of MobileNetV2-LSTM-SelfMLP (q1) on Raw Dataset

Model: MobileNetV2-LSTM-SelfMLP (q3) on Raw Dataset

The accuracy and loss curves during the training of **MobileNetV2-LSTM-SelfMLP (q3)** on Raw Dataset is given Table S2:

Table S2: Accuracy and Loss curves of MobileNetV2-LSTM-SelfMLP (q3) training on raw dataset

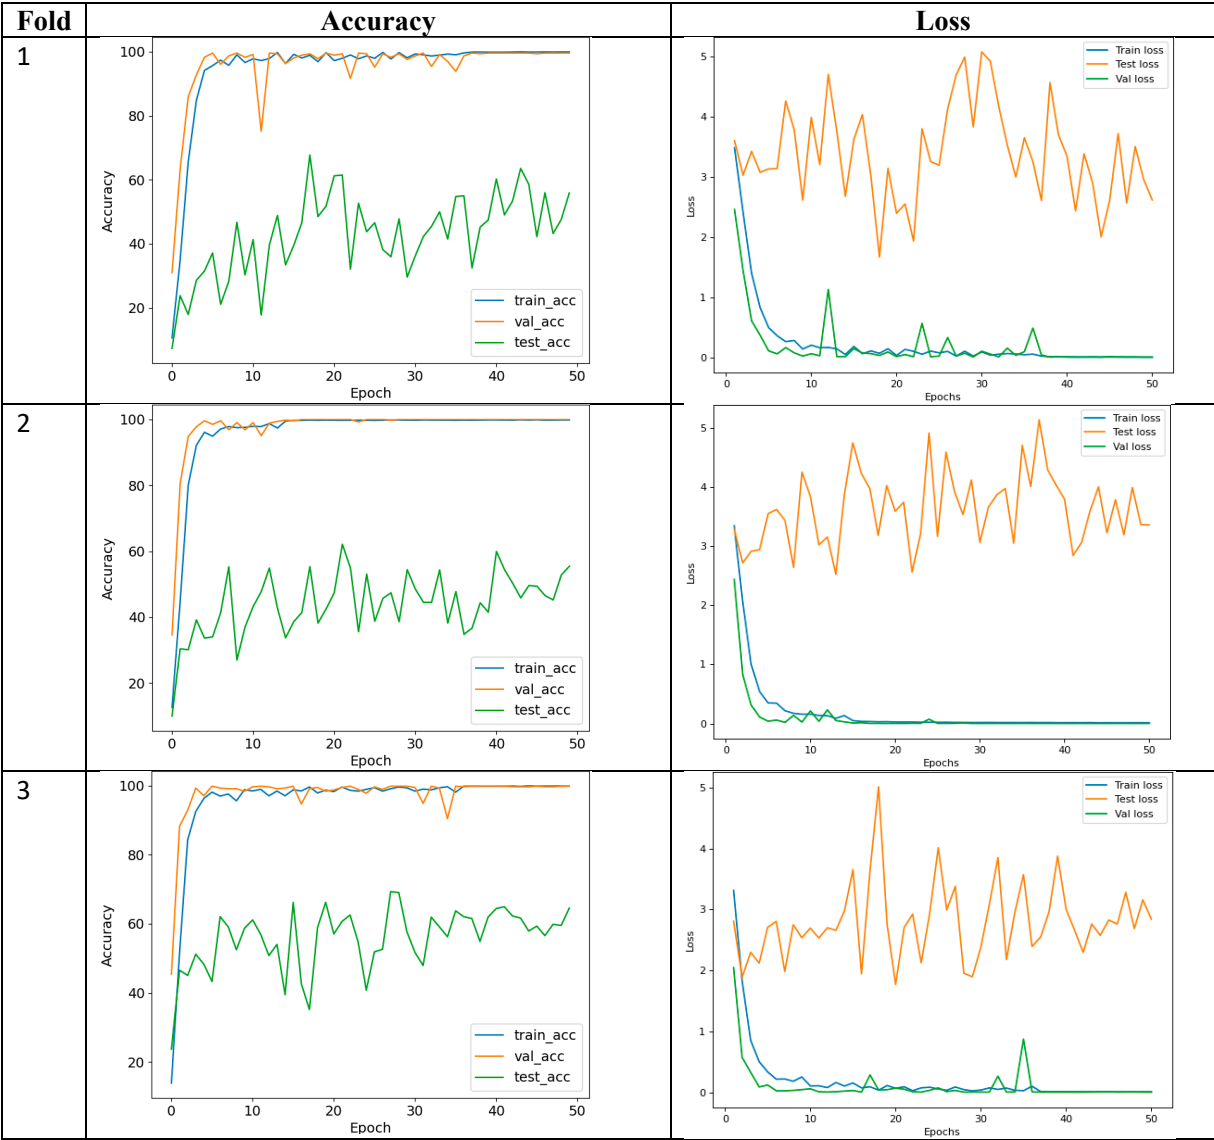

4

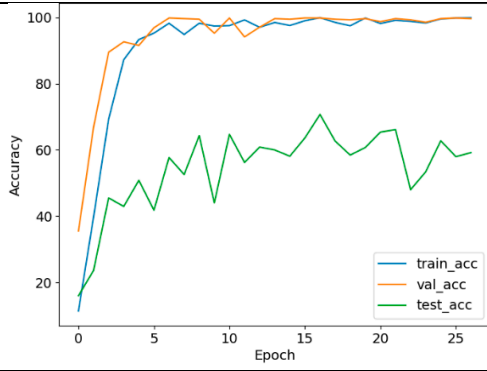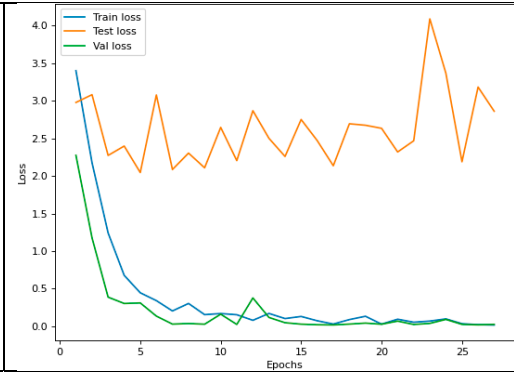

**Confusion Matrix:** The Confusion Matrix of MobileNetV2-LSTM-SelfMLP (q3) on Raw Dataset is given below:

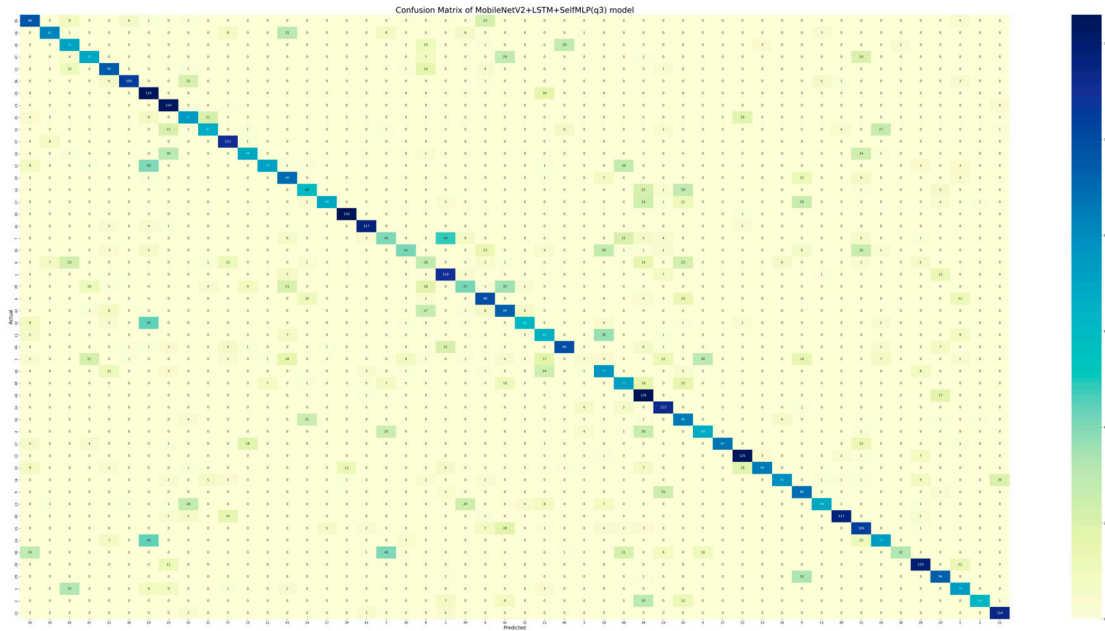

Figure S3: Confusion Matrix of MobileNetV2-LSTM-SelfMLP (q3) on Raw Dataset

**ROC Curve:** The ROC Curve of MobileNetV2-LSTM-SelfMLP (q3) on Raw Dataset is given below:

## ROC curve of MobileNetV2-LSTM-SelfMLP(q3)

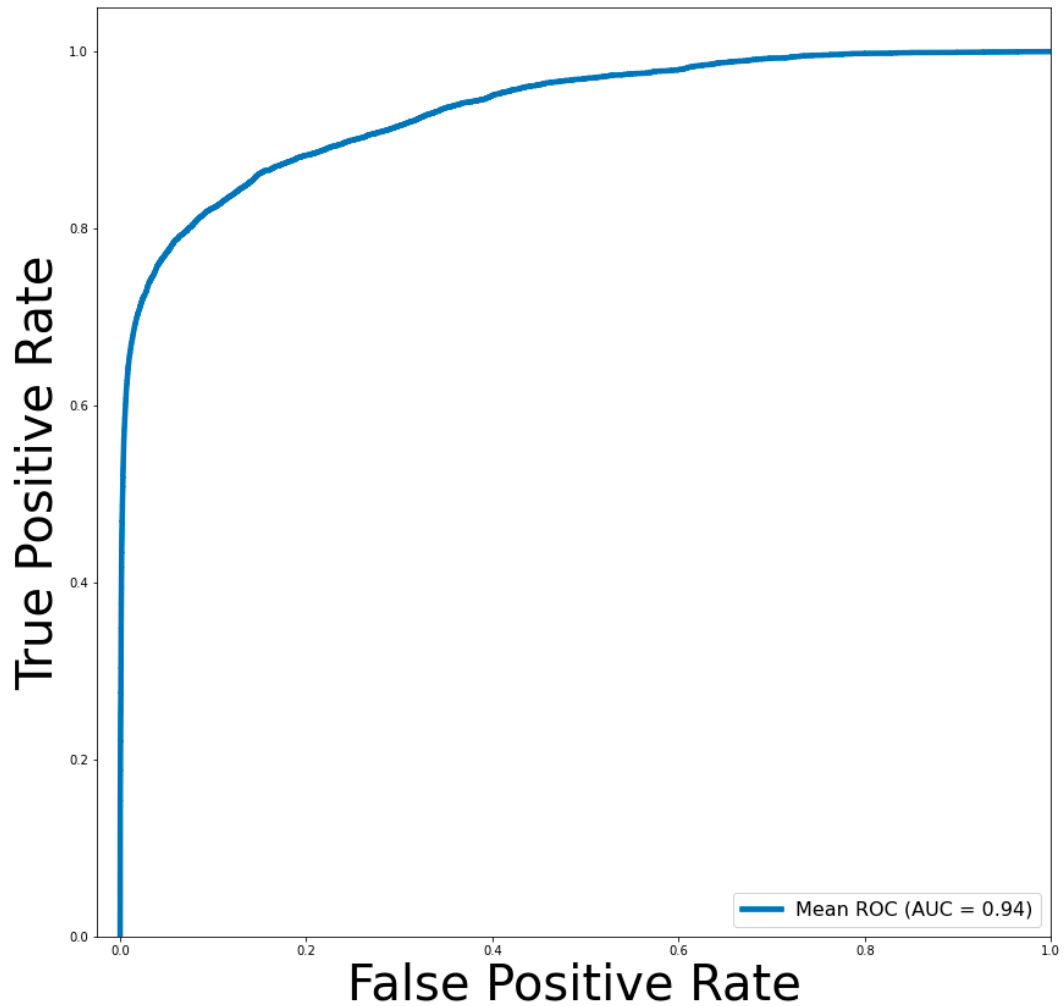

Figure S4: ROC Curve of MobileNetV2-LSTM-SelfMLP (q3) on Raw Dataset



Model: MobileNetV2-LSTM-SelfMLP (q5) on Raw Dataset

The accuracy and loss curves during the training of **MobileNetV2-LSTM-SelfMLP (q5)** on Raw Dataset is given Table S3:

Table S3: Accuracy and Loss curves of MobileNetV2-LSTM-SelfMLP (q3) training on raw dataset

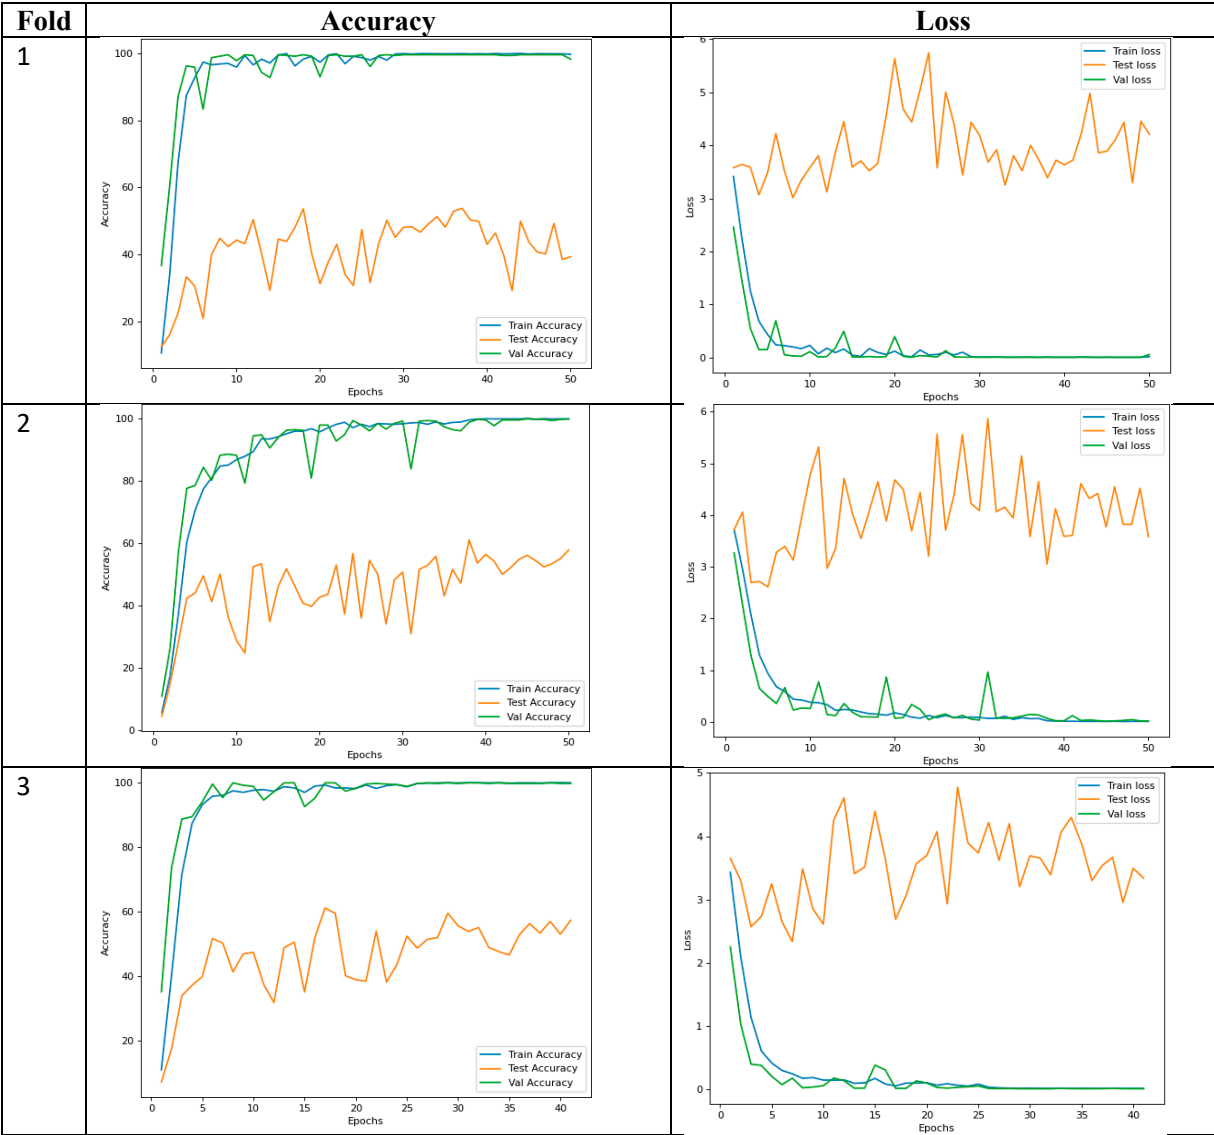

4

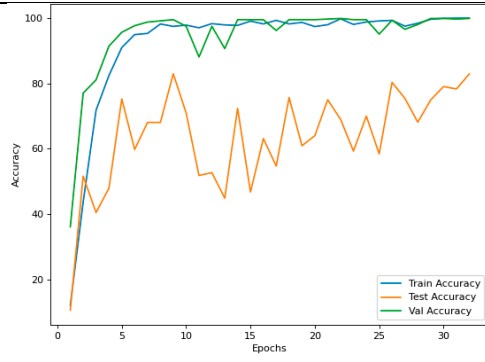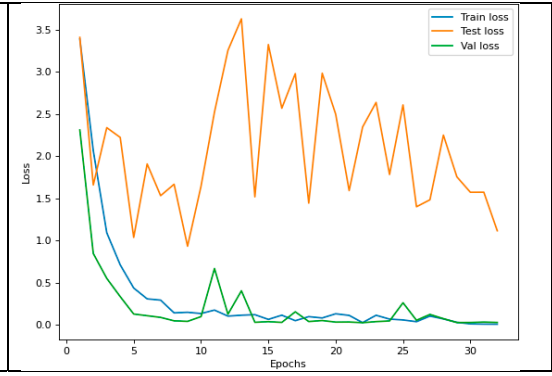

**Confusion Matrix:** The Confusion Matrix of MobileNetV2-LSTM-SelfMLP (q5) on Raw Dataset is given below:

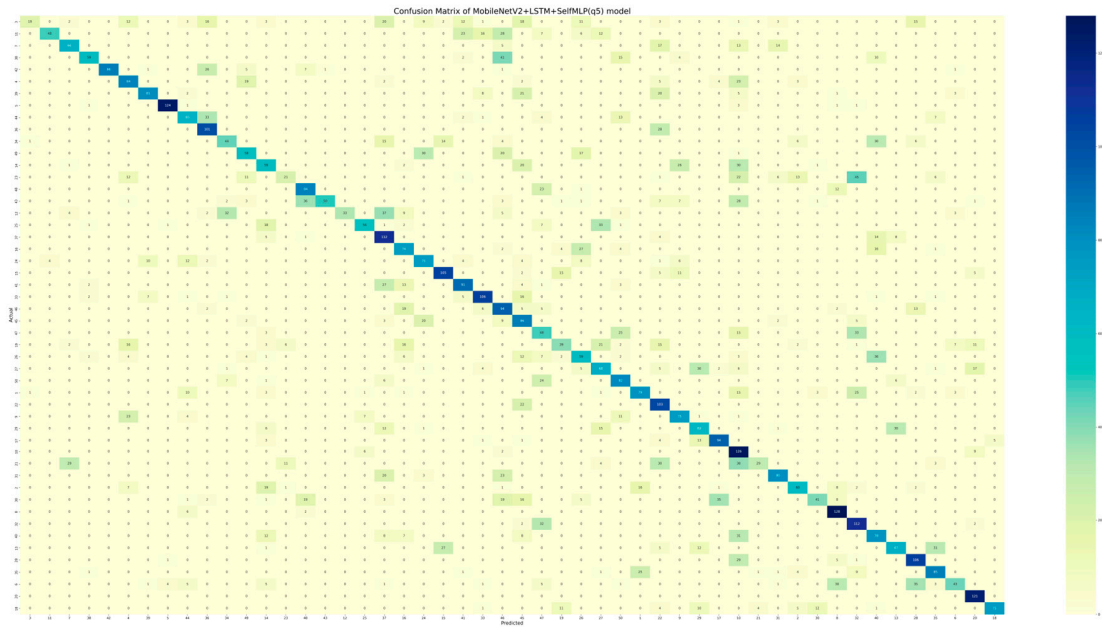

Figure S5: Confusion Matrix of MobileNetV2-LSTM-SelfMLP (q5) on Raw Dataset

**ROC Curve:** The ROC Curve of MobileNetV2-LSTM-SelfMLP (q5) on Raw Dataset is given below:

## ROC curve of MobileNetV2-LSTM-SelfMLP(q5)

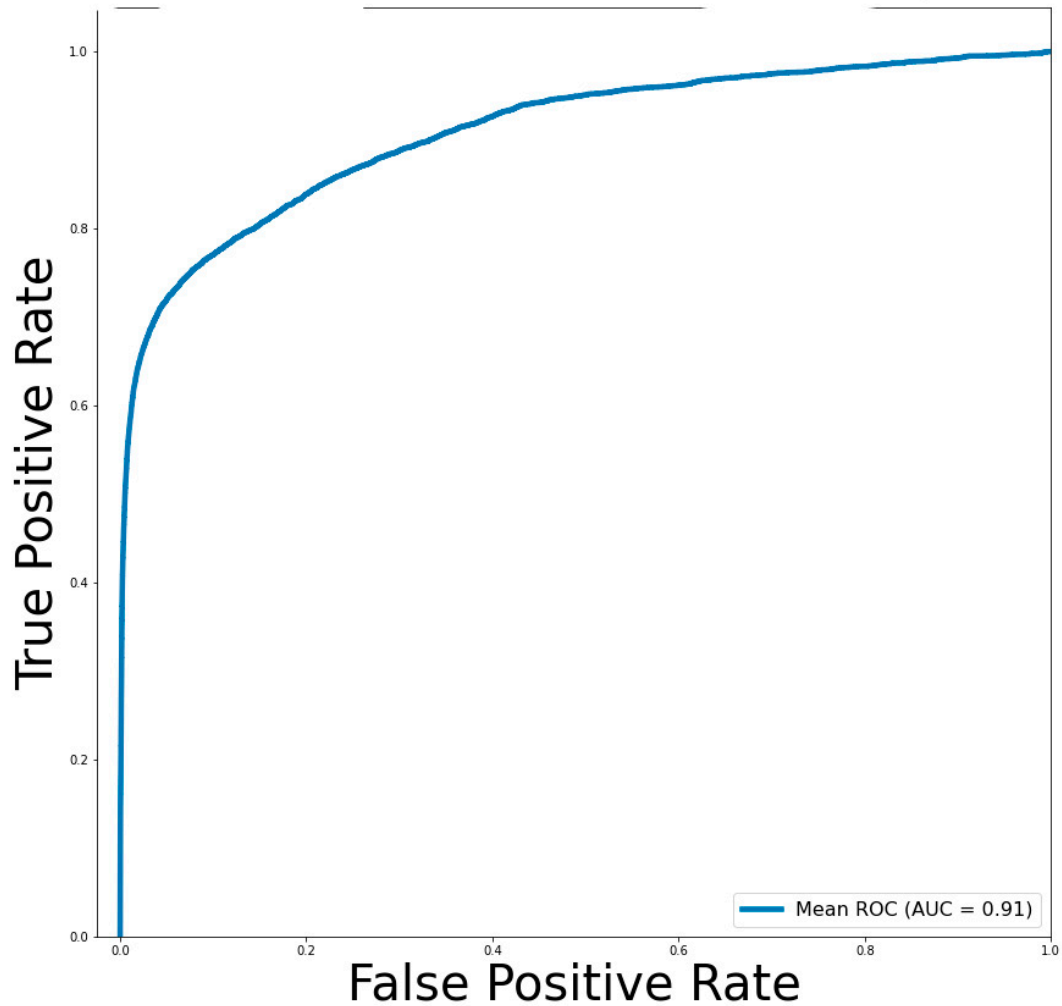

Figure S6: ROC Curve of MobileNetV2-LSTM-SelfMLP (q5) on Raw Dataset

Model: ResNet18-LSTM-SelfMLP(q1) on Raw Dataset

The accuracy and loss curves during the training of **ResNet18-LSTM-SelfMLP(q1)** on Raw Dataset is given Table S4:

Table S4: Accuracy and Loss curves of ResNet18-LSTM-SelfMLP(q1) training on raw dataset

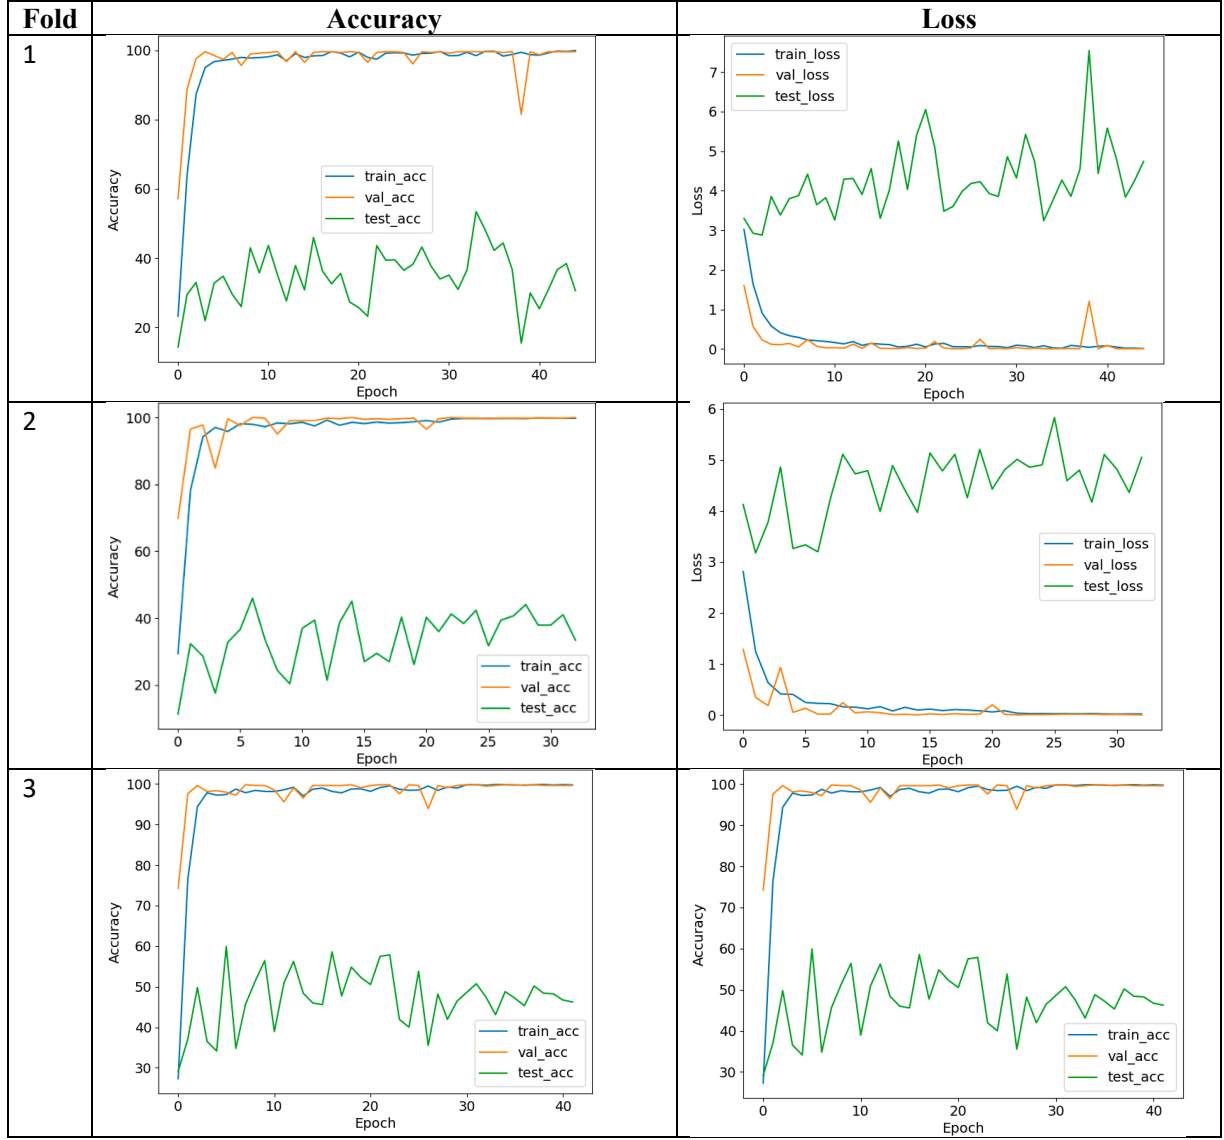

4

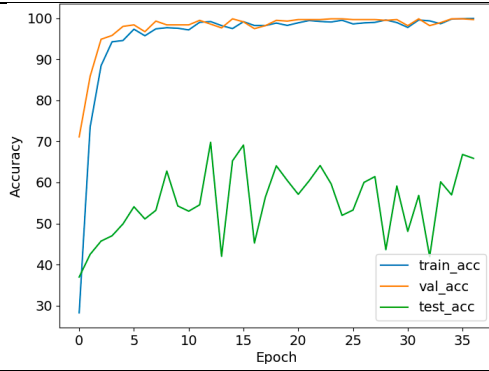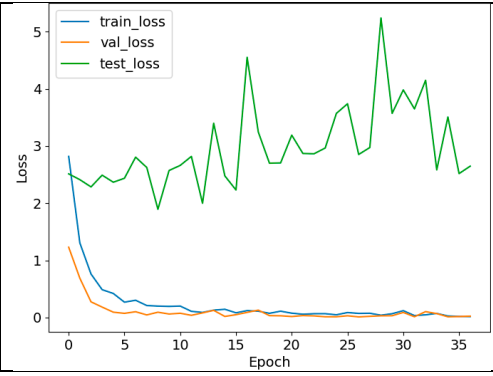

**Confusion Matrix:** The Confusion Matrix of ResNet18-LSTM-SelfMLP(q1) on Raw Dataset is given below:

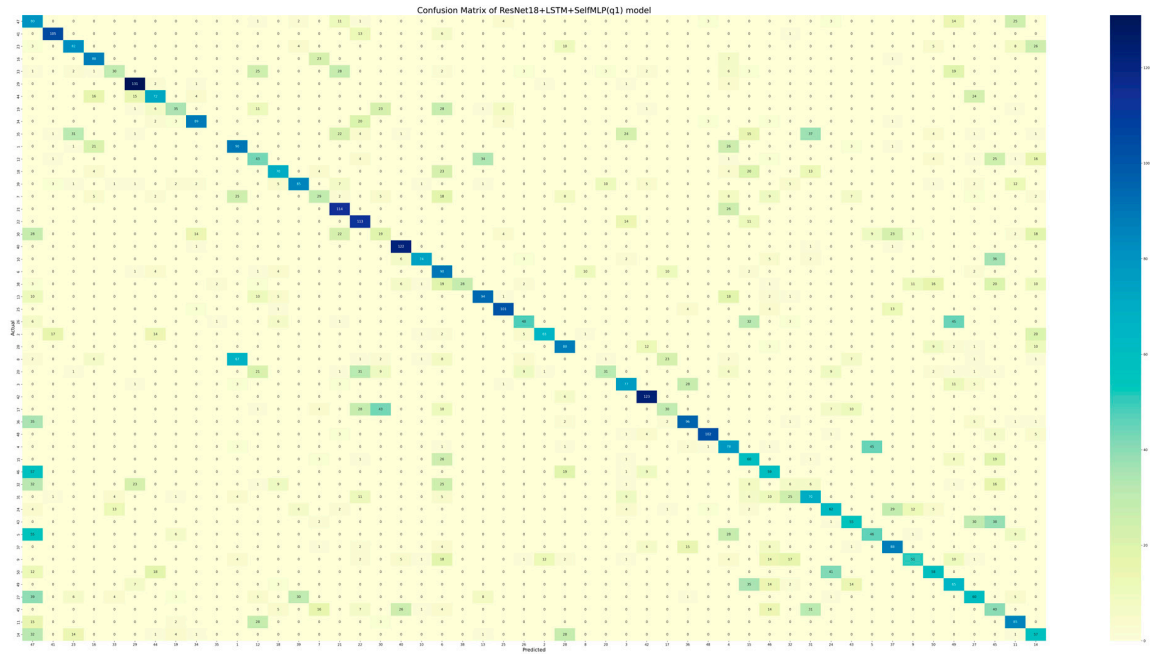

Figure S7: Confusion Matrix of ResNet18-LSTM-SelfMLP(q1) on Raw Dataset

**ROC Curve:** The ROC Curve of ResNet18-LSTM-SelfMLP(q1) on Raw Dataset is given below:

## ROC curve of ResNet18-LSTM-SelfMLP(q1)

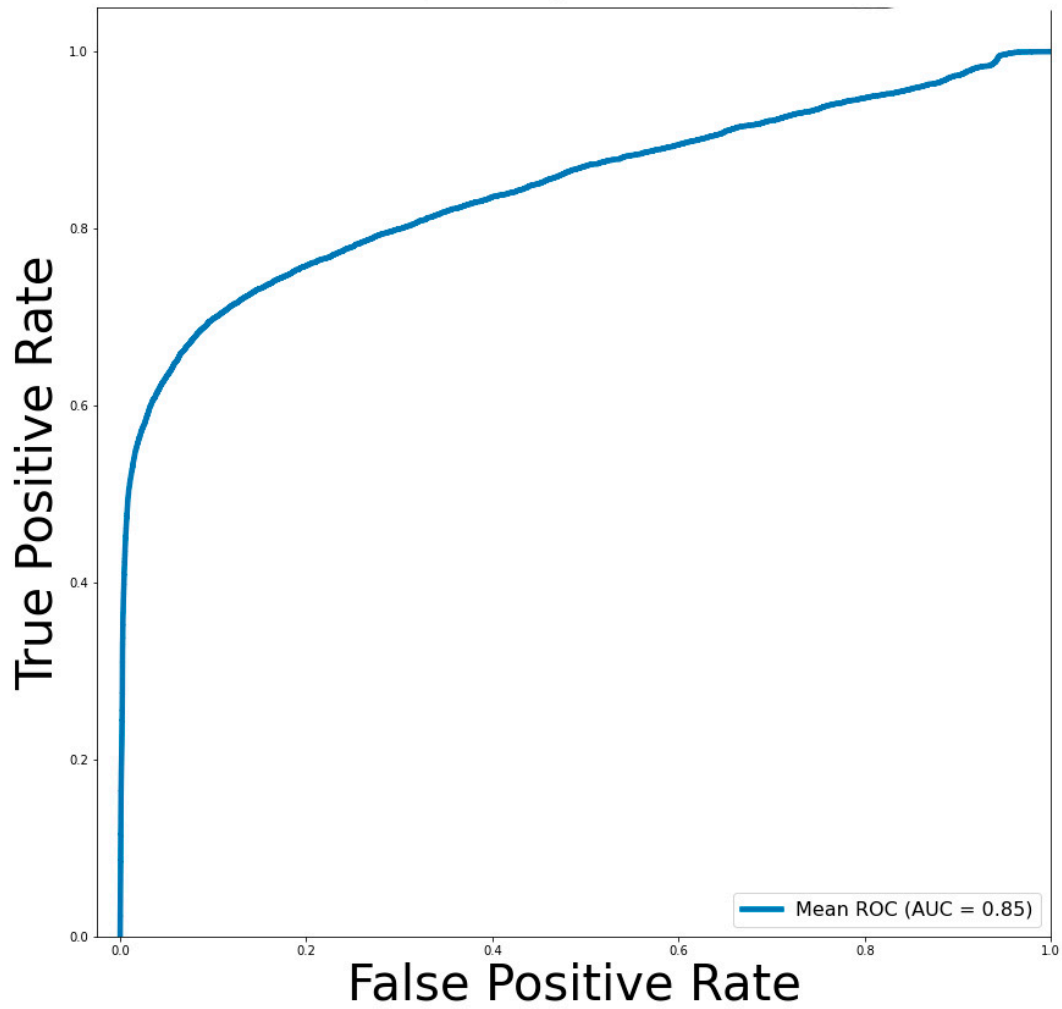

Figure S8: ROC Curve of ResNet18-LSTM-SelfMLP(q1) on Raw Dataset



Model: ResNet18-LSTM-SelfMLP(q3) on Raw Dataset

The accuracy and loss curves during the training of **ResNet18-LSTM-SelfMLP(q3)** on Raw Dataset is given Table S5:

Table S5: Accuracy and Loss curves of ResNet18-LSTM-SelfMLP(q3) training on raw dataset

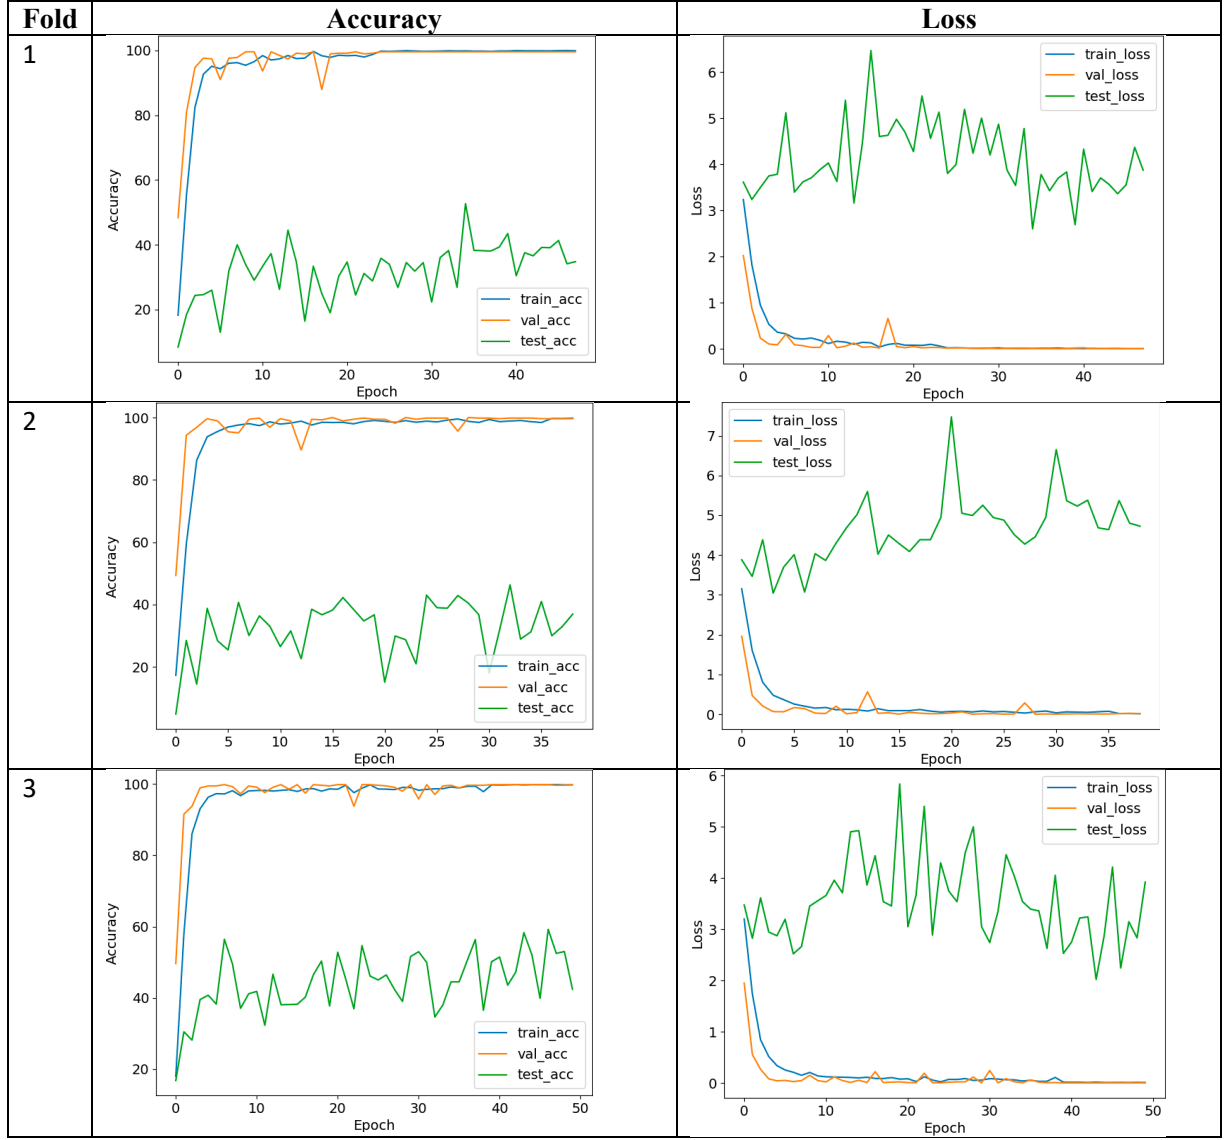

4

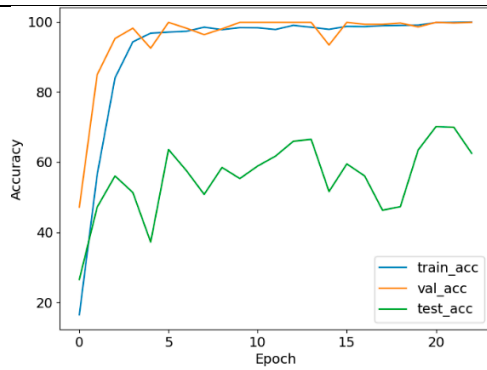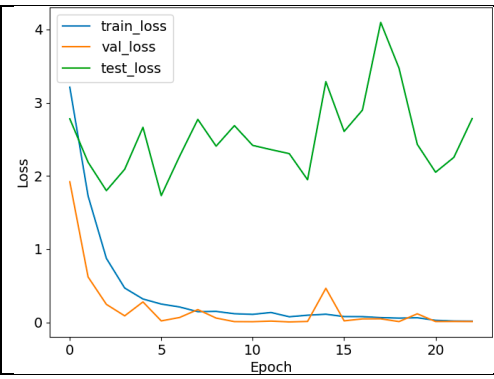

**Confusion Matrix:** The Confusion Matrix of ResNet18-LSTM-SelfMLP(q3) on Raw Dataset is given below:

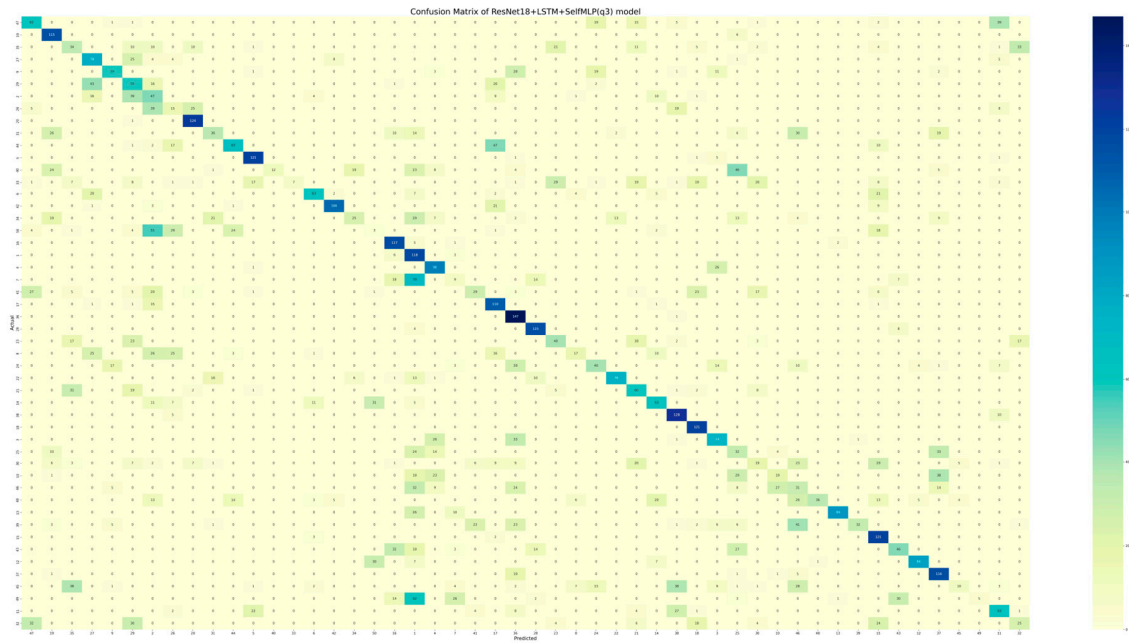

Figure S9: Confusion Matrix of ResNet18-LSTM-SelfMLP(q3) on Raw Dataset

**ROC Curve:** The ROC Curve of ResNet18-LSTM-SelfMLP(q3) on Raw Dataset is given below:

## ROC curve of ResNet18-LSTM-SelfMLP(q3)

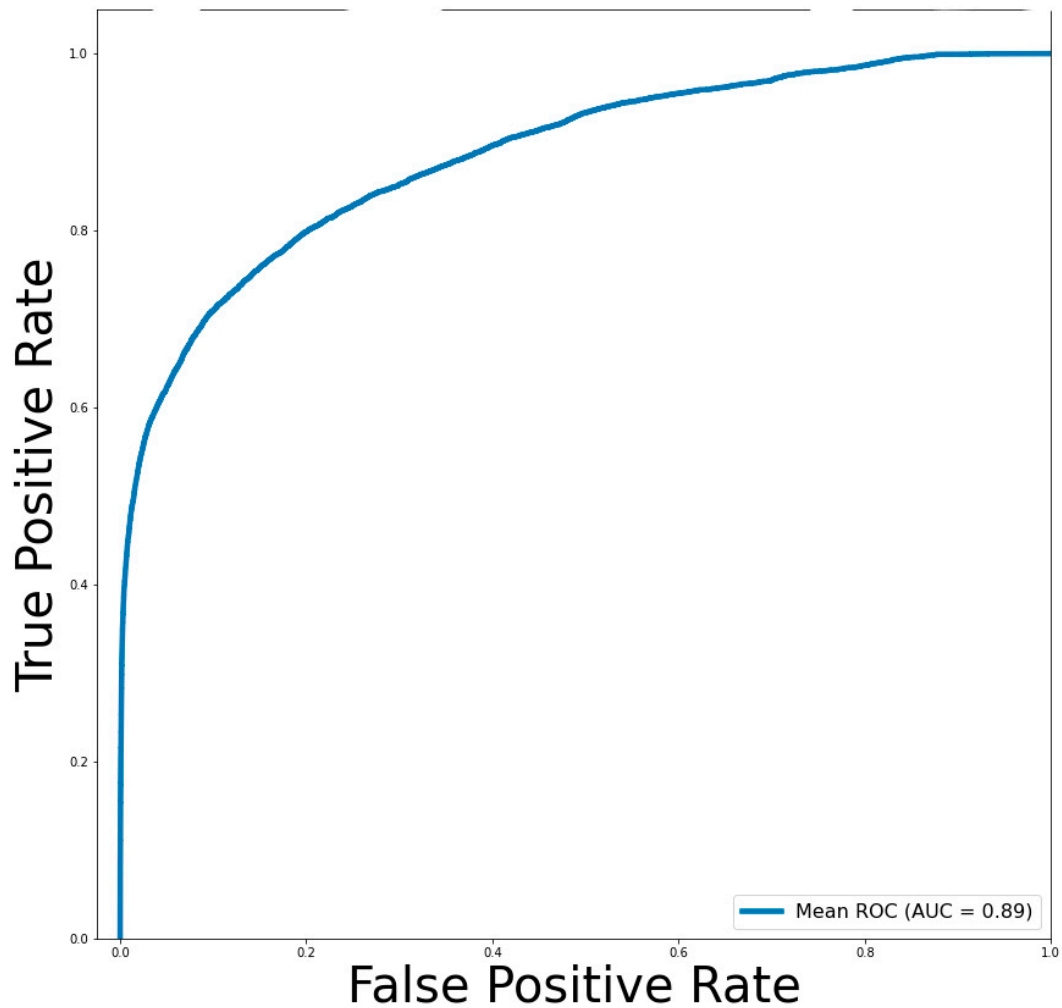

*Figure S10: ROC Curve of ResNet18-LSTM-SelfMLP (q3) on Raw Dataset*

Model: ResNet18-LSTM-SelfMLP(q5) on Raw Dataset

The accuracy and loss curves during the training of **ResNet18-LSTM-SelfMLP(q5)** on Raw Dataset is given Table S6:

Table S6: Accuracy and Loss curves of ResNet18-LSTM-SelfMLP(q3) training on raw dataset

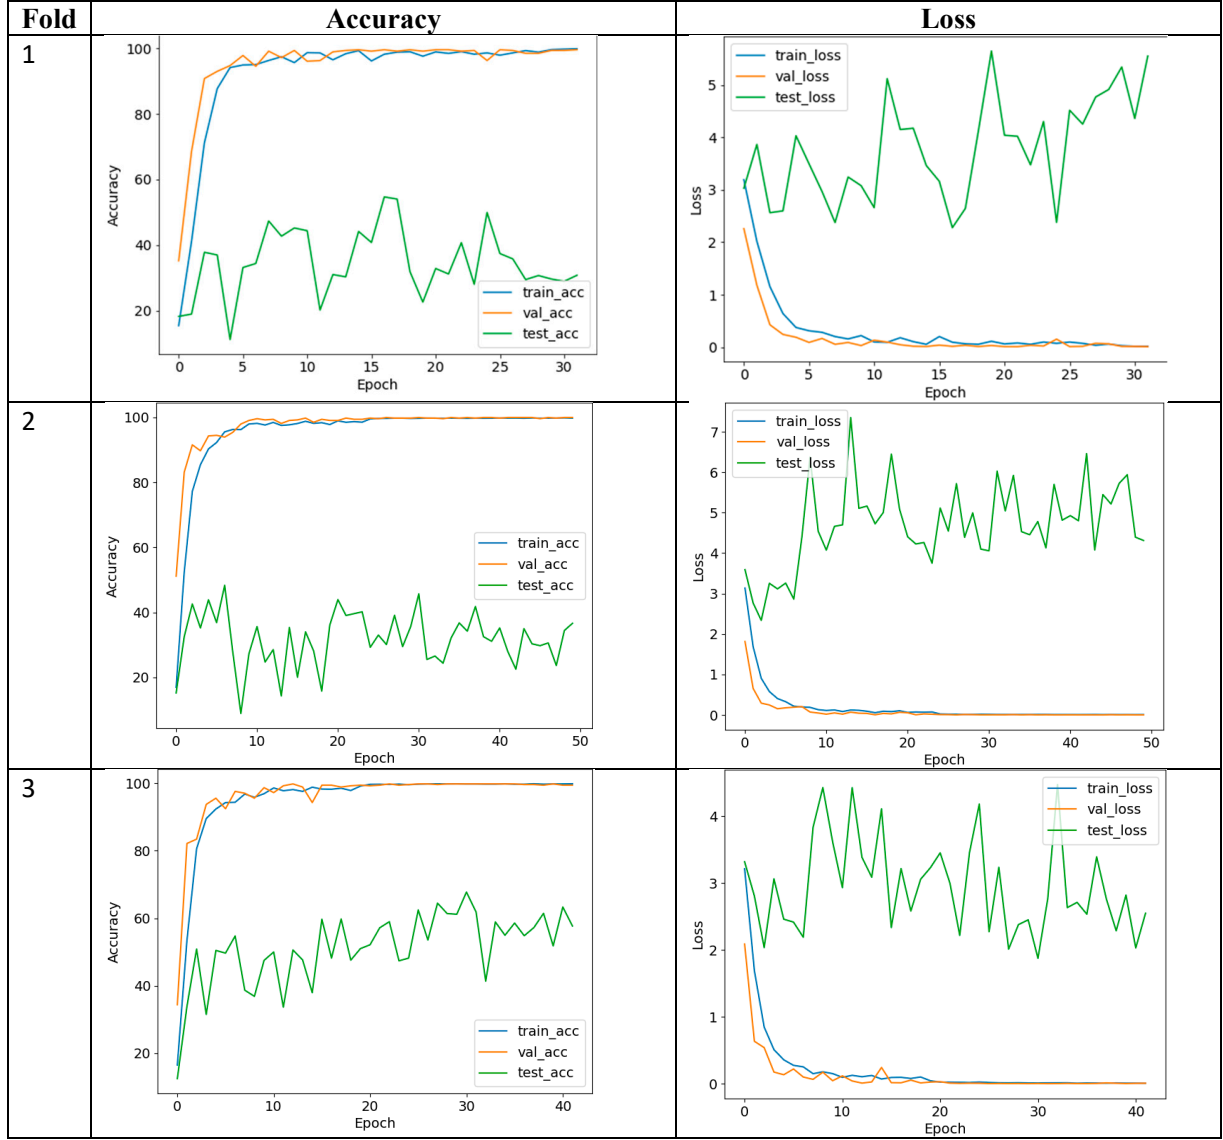

4

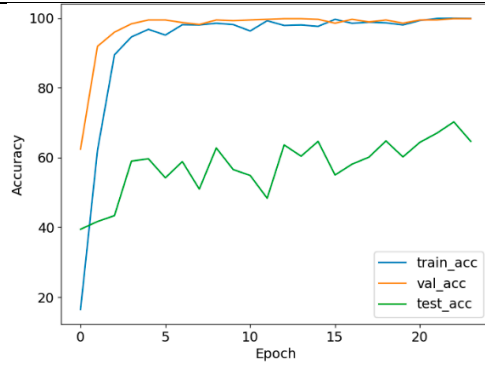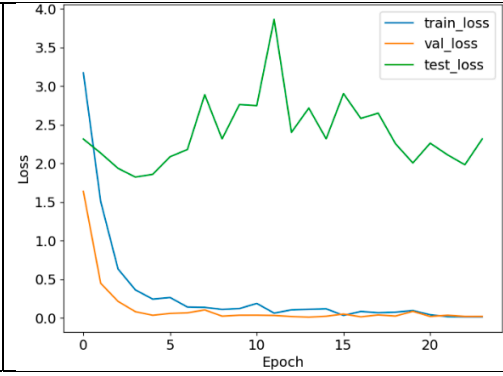

**Confusion Matrix:** The Confusion Matrix of ResNet18-LSTM-SelfMLP(q5) on Raw Dataset is given below:

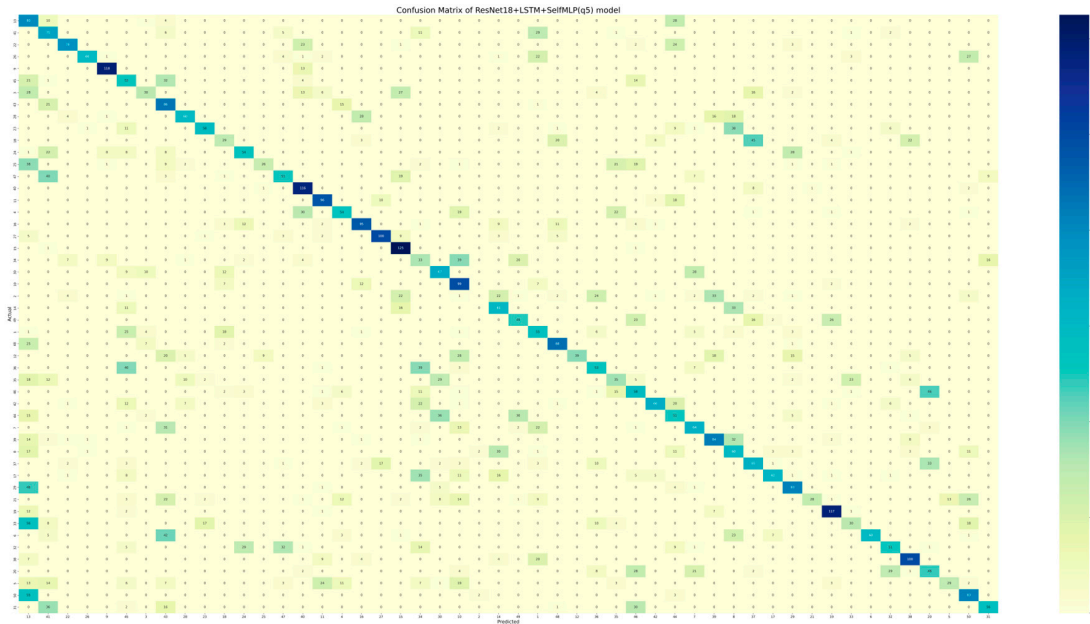

Figure S11: Confusion Matrix of ResNet18-LSTM-SelfMLP(q5) on Raw Dataset

**ROC Curve:** The ROC Curve of ResNet18-LSTM-SelfMLP+ LSTM + SelfMLP (q5) on Raw Dataset is given below:

## ROC curves of ResNet18-LSTM-SelfMLP(q5)

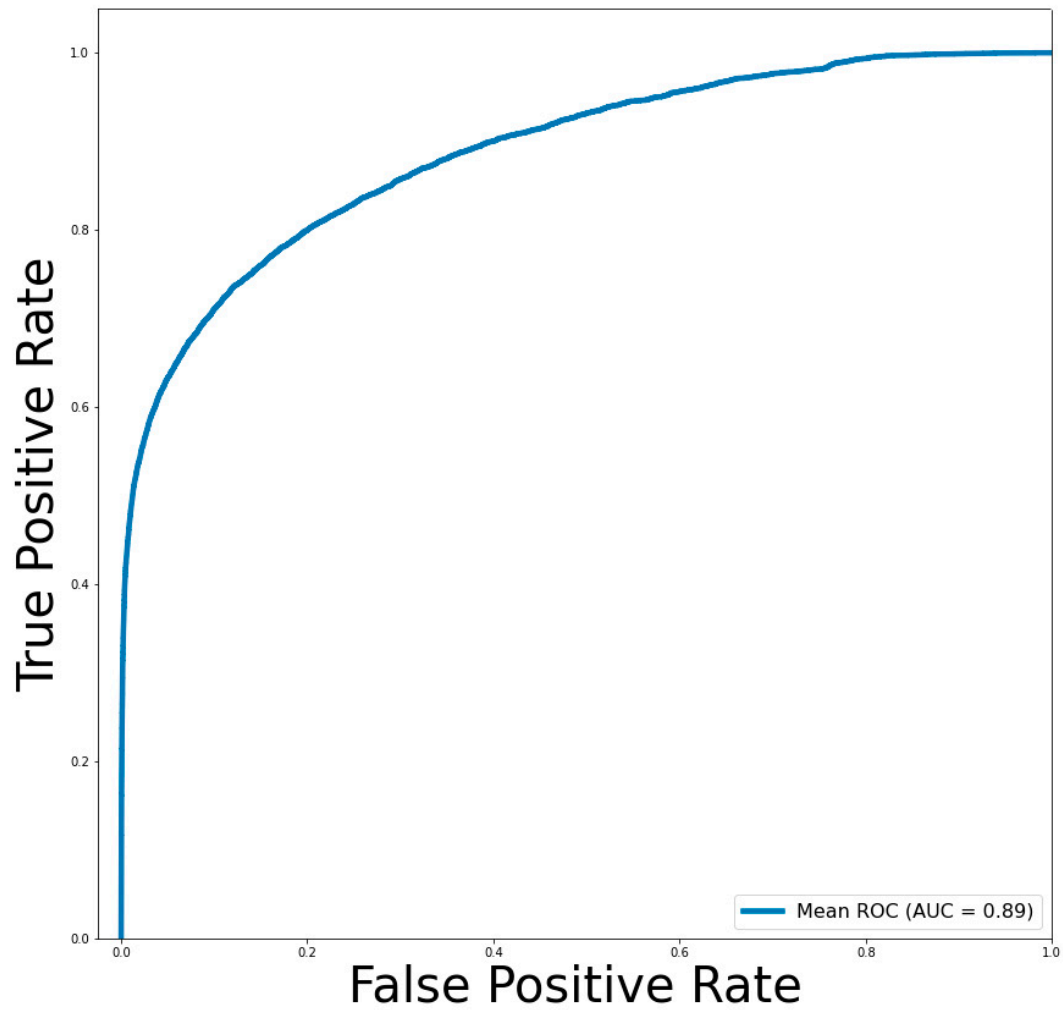

Figure S12: ROC Curve of ResNet18-LSTM-SelfMLP (q5) on Raw Dataset



Model: MobileNetV2-LSTM-SelfMLP (q1) on Segmented Dataset

The accuracy and loss curves during the training of **MobileNetV2-LSTM-SelfMLP (q1)** on Segmented Dataset is given Table S7:

Table S7: Accuracy and Loss curves of MobileNetV2-LSTM-SelfMLP (q1) training

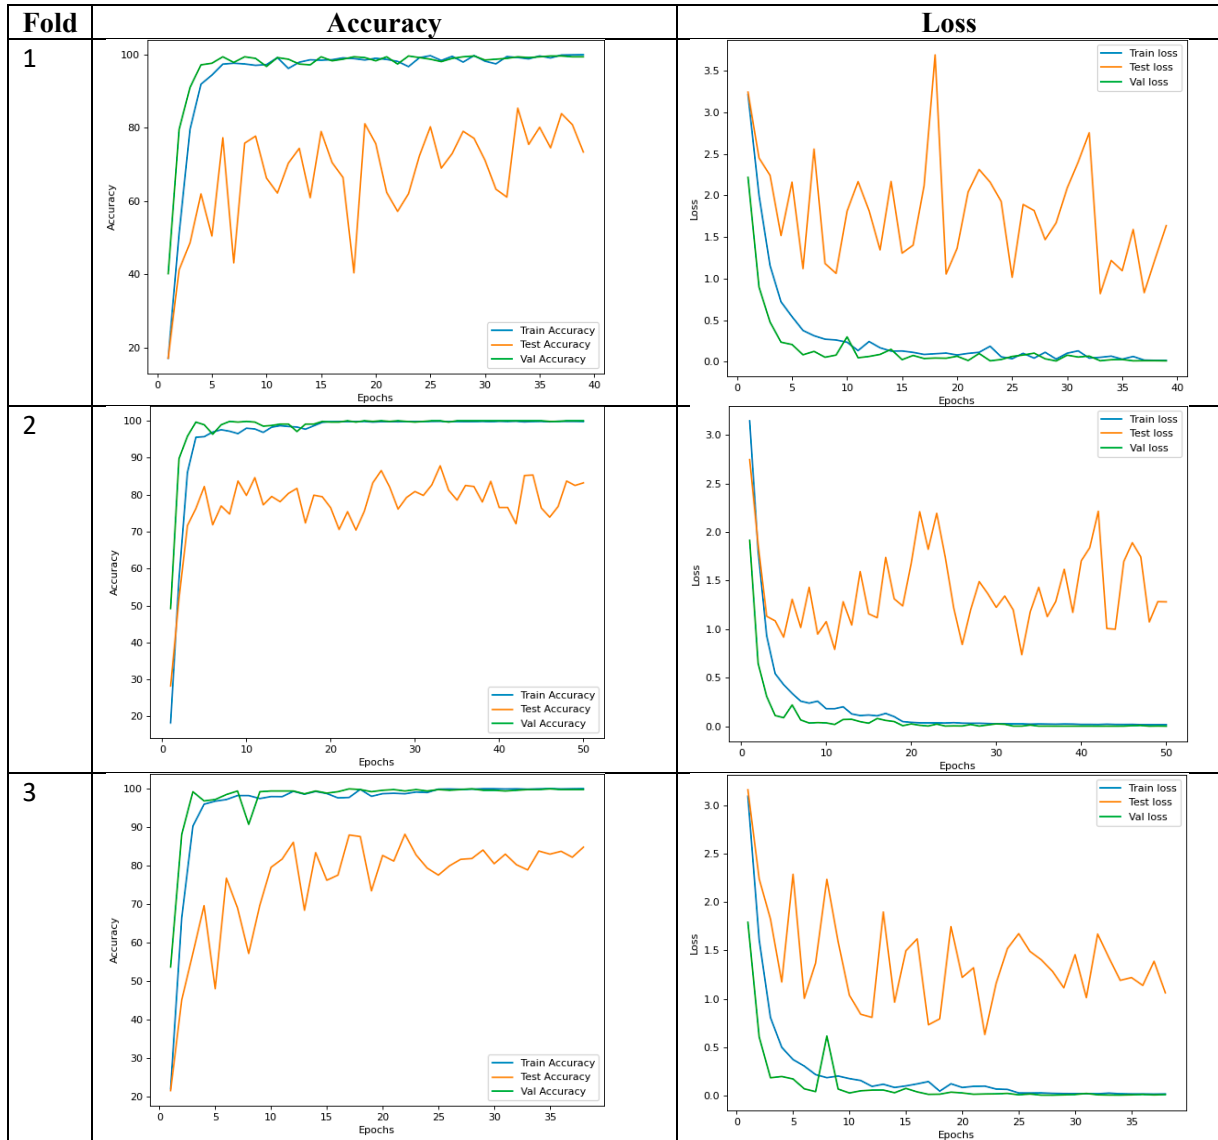

4

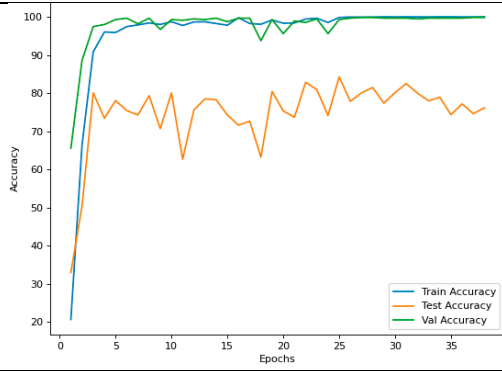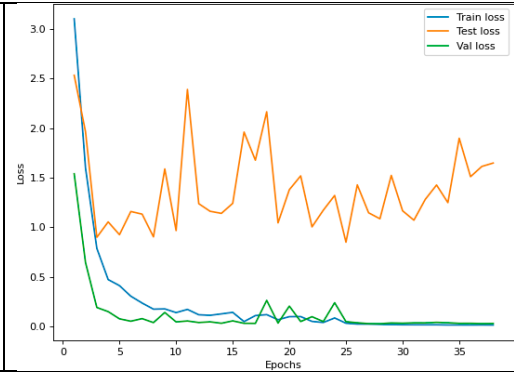

**Confusion Matrix:** The Confusion Matrix of MobileNetV2-LSTM-SelfMLP (q1) on Segmented Dataset is given below:

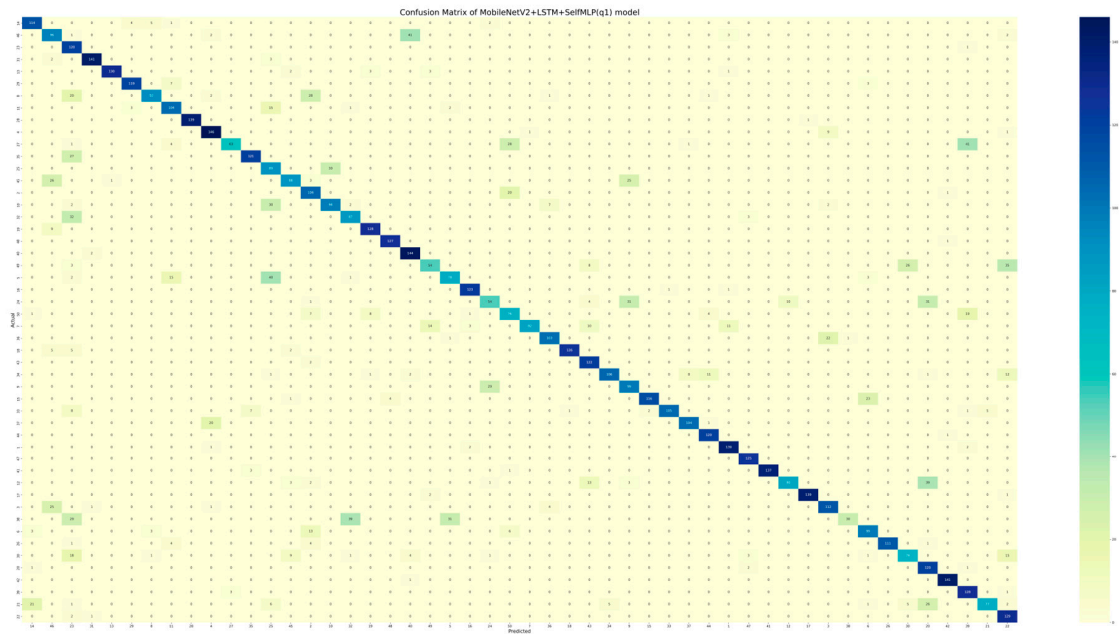

Figure S13: Confusion Matrix of MobileNetV2-LSTM-SelfMLP (q1) on Segmented Dataset

**ROC Curve:** The ROC Curve of MobileNetV2-LSTM-SelfMLP (q1) on Segmented Dataset is given below:

## ROC curve of MobileNetV2-LSTM-SelfMLP(q1)

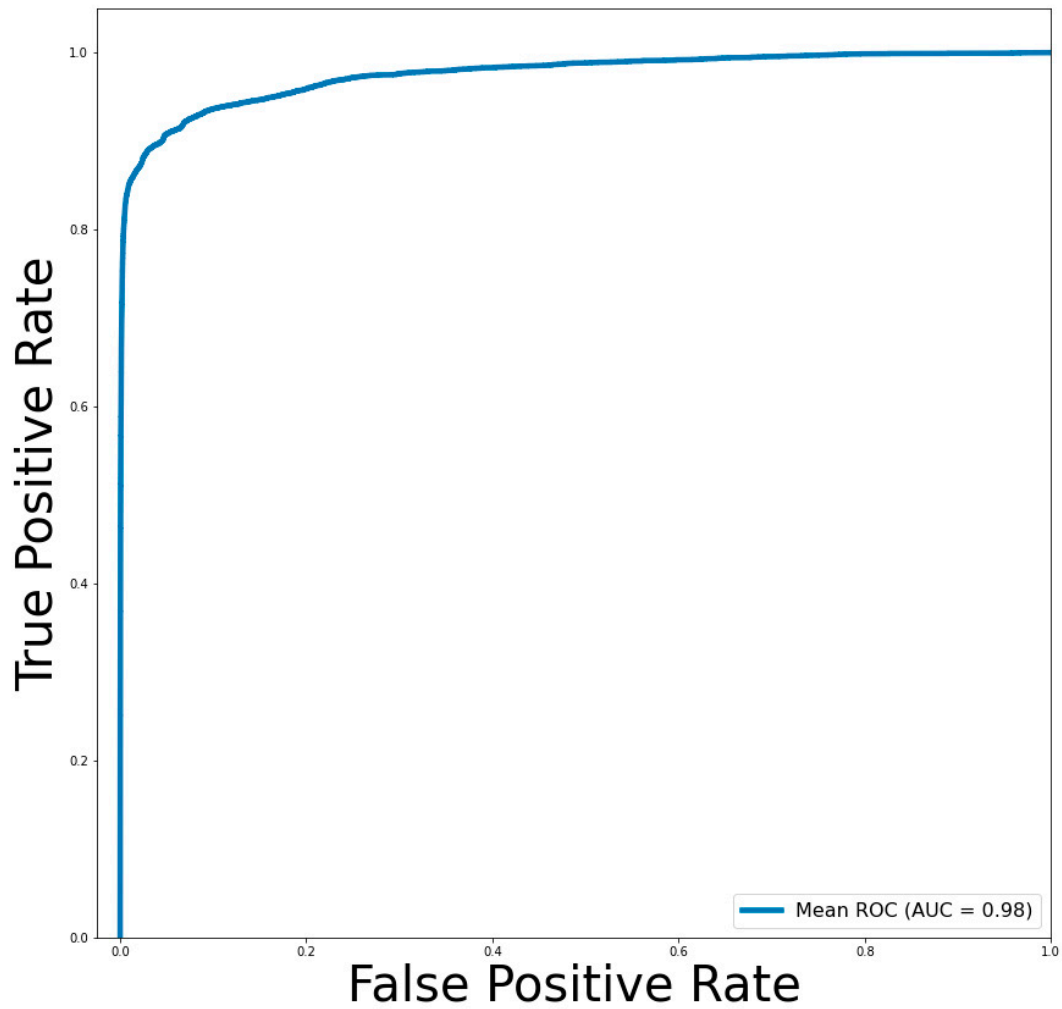

*Figure S14: ROC Curve of MobileNetV2-LSTM-SelfMLP (q1) on Segmented Dataset*

Model: MobileNetV2-LSTM-SelfMLP (q3) on Segmented Dataset

The accuracy and loss curves during the training of **MobileNetV2-LSTM-SelfMLP (q3)** on Segmented Dataset is given Table S8:

Table S8: Accuracy and Loss curves of MobileNetV2-LSTM-SelfMLP (q3) training

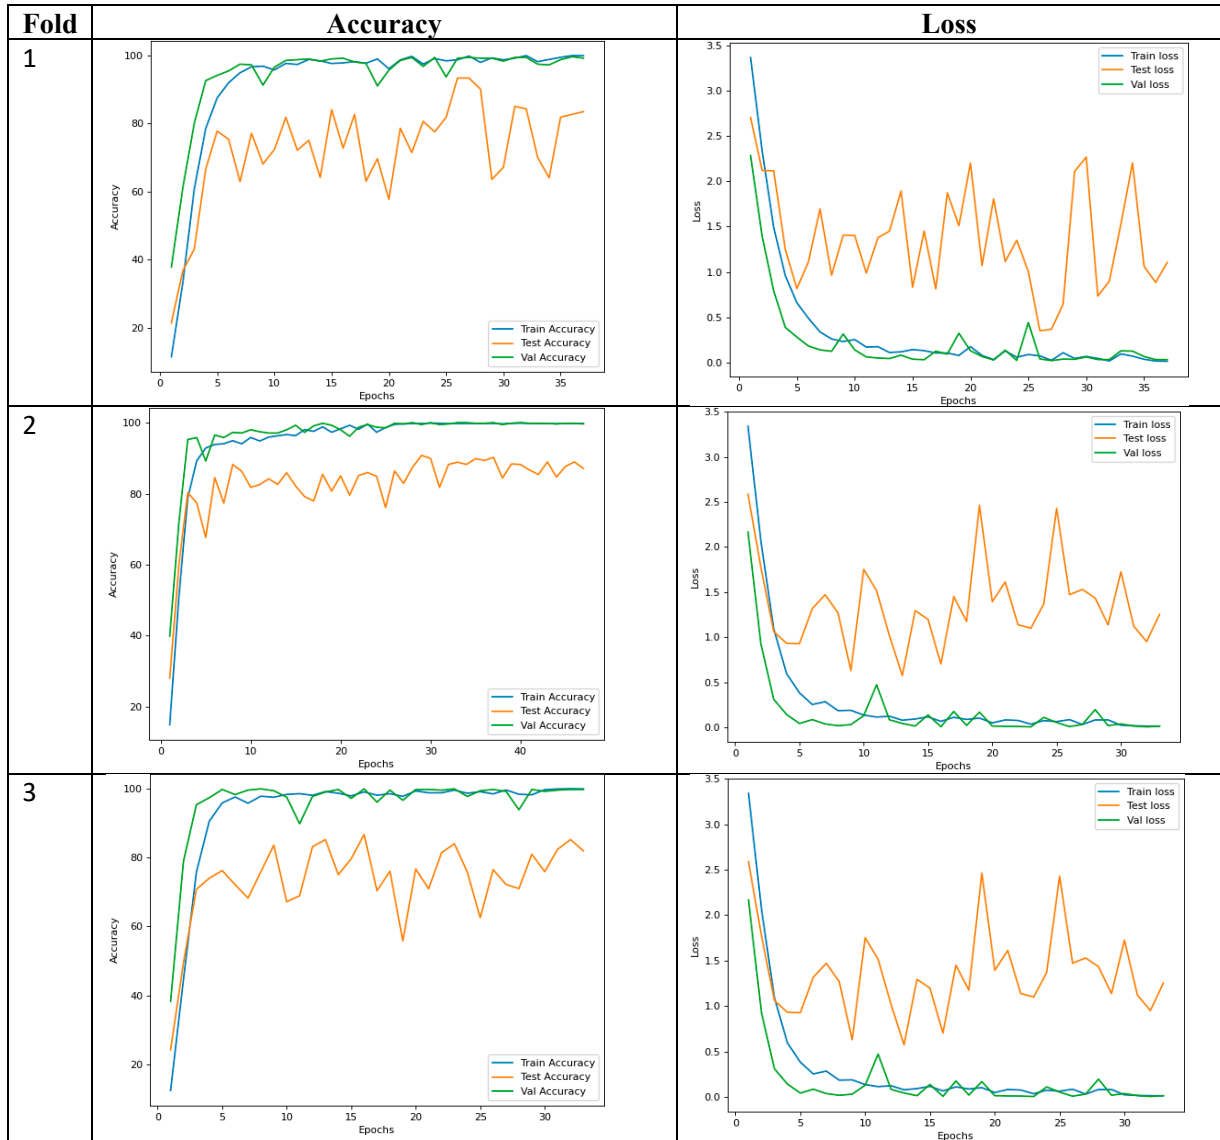

4

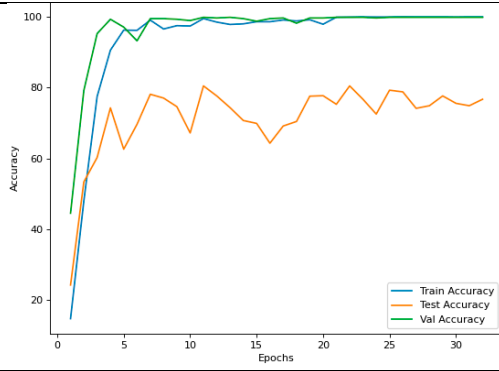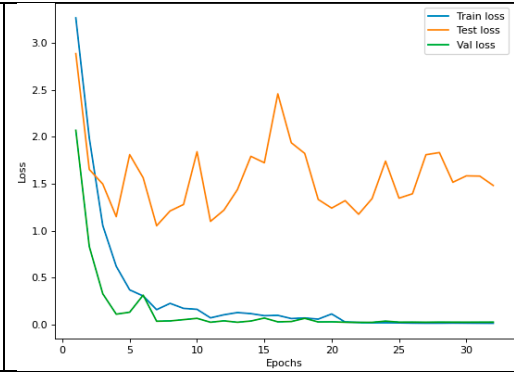

**Confusion Matrix:** The Confusion Matrix of MobileNetV2-LSTM-SelfMLP (q3) on Segmented Dataset is given below:

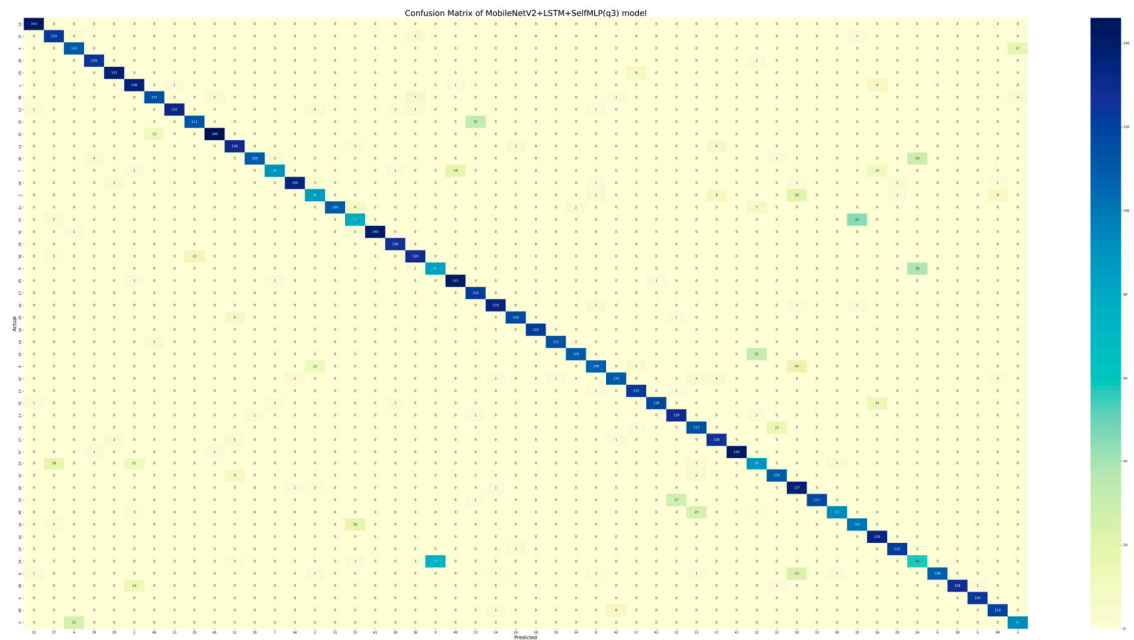

Figure S15: Confusion Matrix of MobileNetV2-LSTM-SelfMLP (q3) on Segmented Dataset

**ROC Curve:** The ROC Curve of MobileNetV2-LSTM-SelfMLP (q3) on Segmented Dataset is given below:

## ROC curve of MobileNetV2-LSTM-SelfMLP(q3)

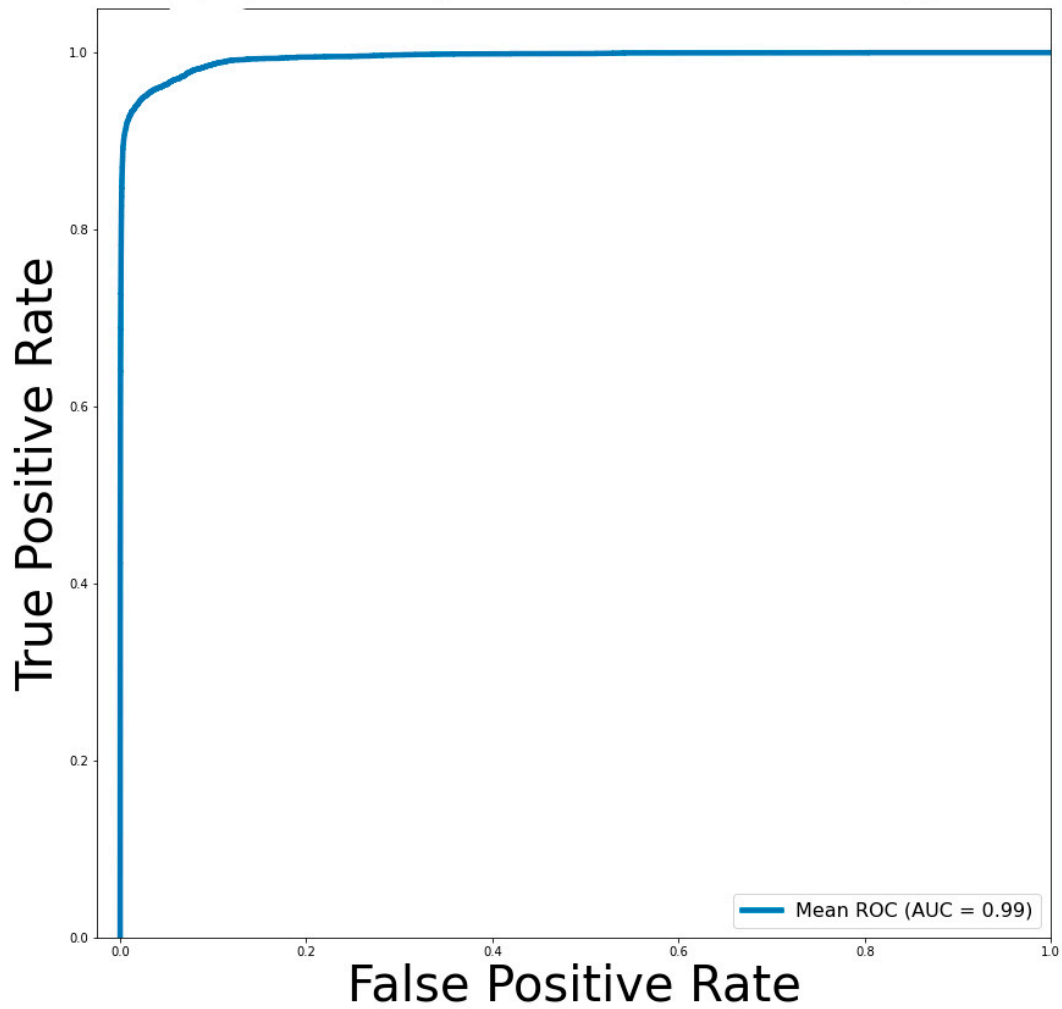

Figure S16: ROC Curve of MobileNetV2-LSTM-SelfMLP (q3) on Segmented Dataset



Model: MobileNetV2-LSTM-SelfMLP (q5) on Segmented Dataset

The accuracy and loss curves during the training of **MobileNetV2-LSTM-SelfMLP (q5)** on Segmented Dataset is given Table S9:

Table S9: Accuracy and Loss curves of MobileNetV2-LSTM-SelfMLP (q5) training

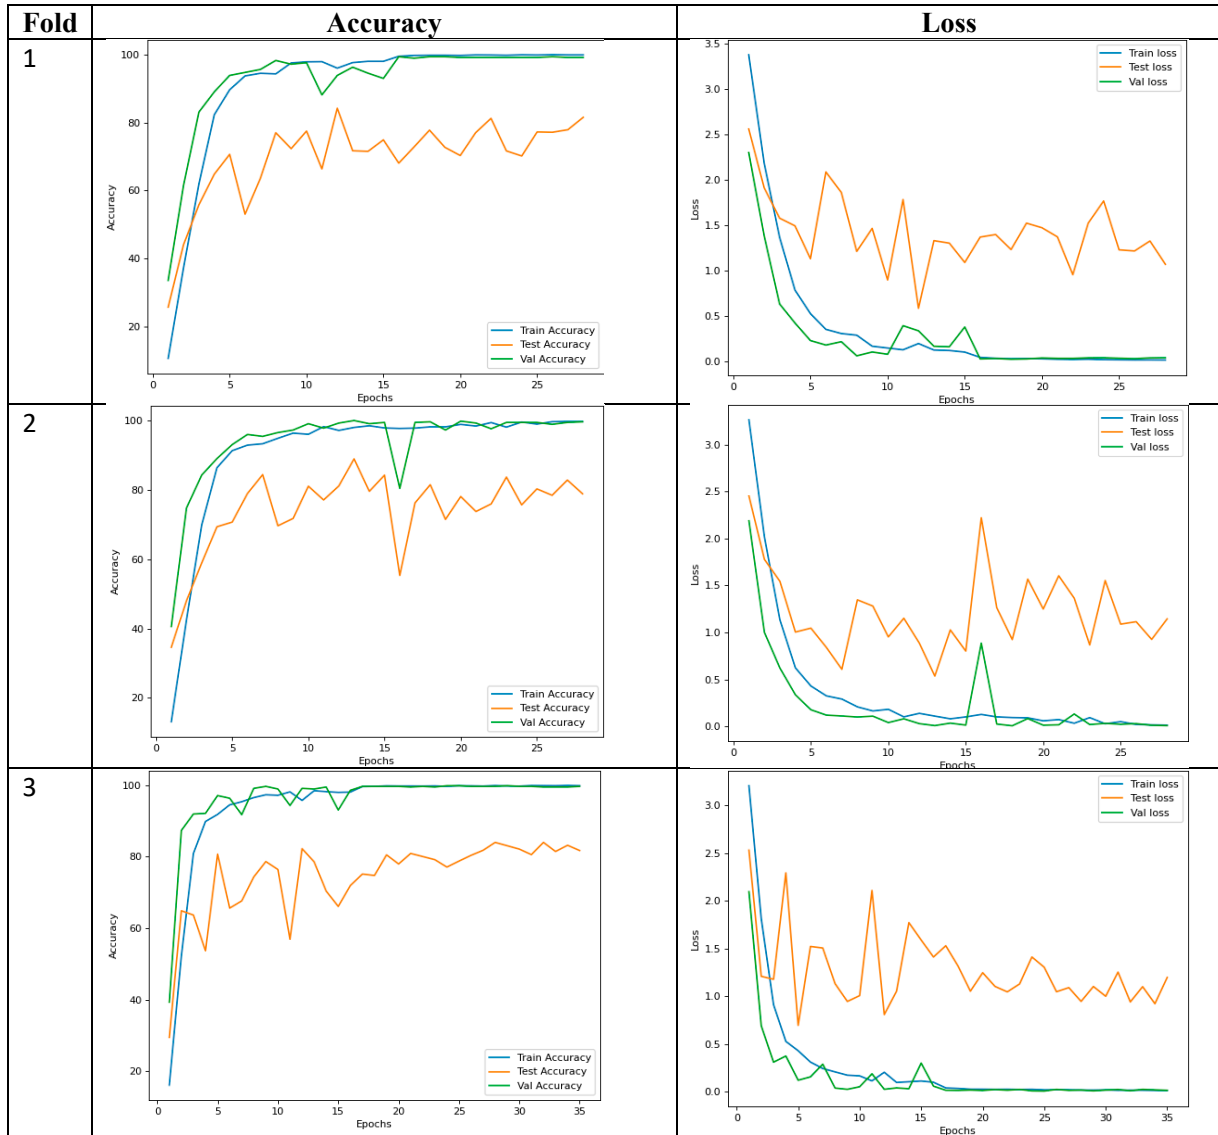

4

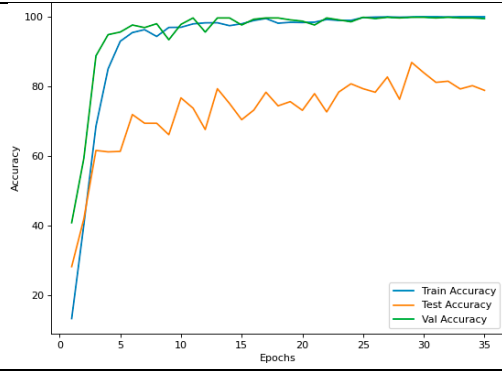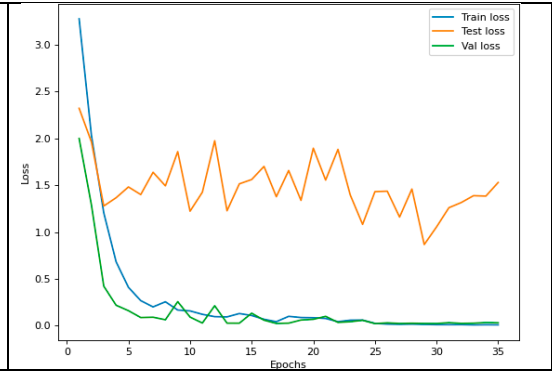

**Confusion Matrix:** The Confusion Matrix of MobileNetV2-LSTM-SelfMLP (q5) on Segmented Dataset is given below:

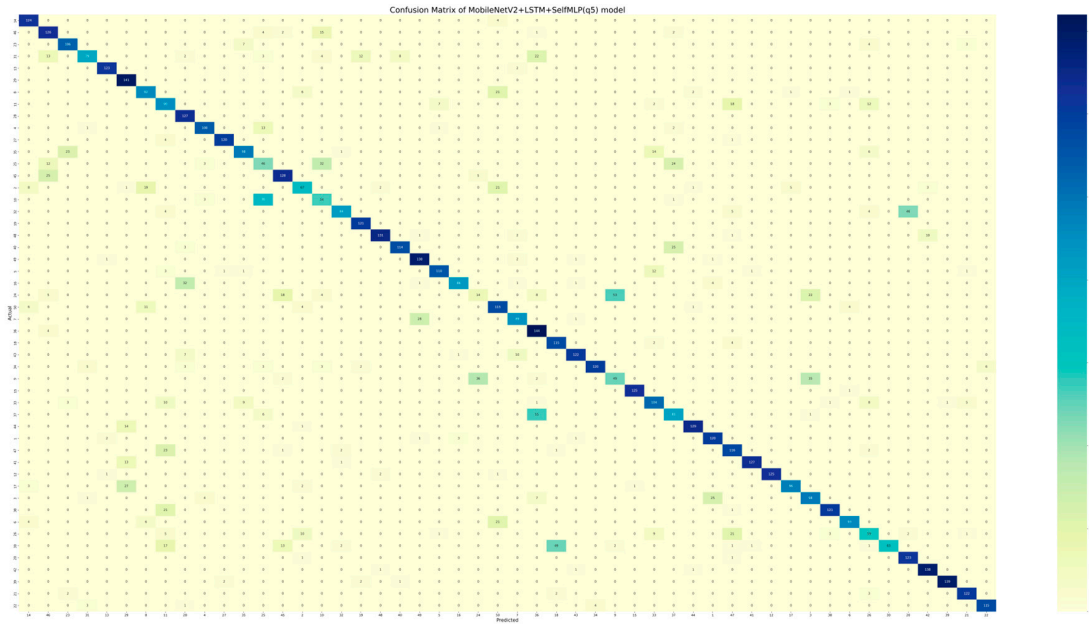

Figure S17: Confusion Matrix of MobileNetV2-LSTM-SelfMLP (q5) on Segmented Dataset

**ROC Curve:** The ROC Curve of MobileNetV2-LSTM-SelfMLP (q5) on Segmented Dataset is given below:

## ROC curve of MobileNetV2-LSTM-SelfMLP(q5)

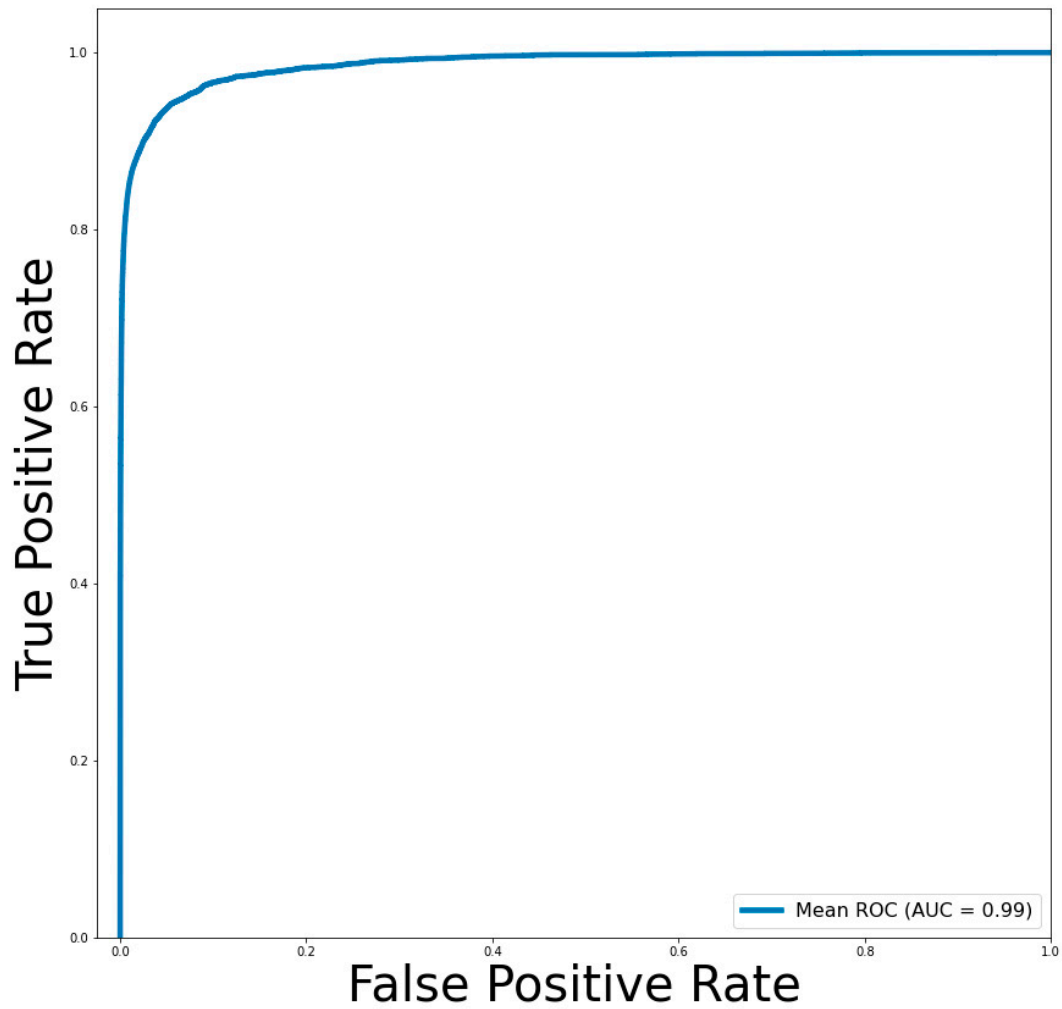

Figure S18: ROC Curve of MobileNetV2-LSTM-SelfMLP (q5) on Segmented Dataset

Model: ResNet18-LSTM-SelfMLP(q1) on Segmented Dataset

The accuracy and loss curves during the training of **ResNet18-LSTM-SelfMLP(q1)** on Segmented Dataset is given Table S10:

Table S10: Accuracy and Loss curves of ResNet18-LSTM-SelfMLP(q1) training

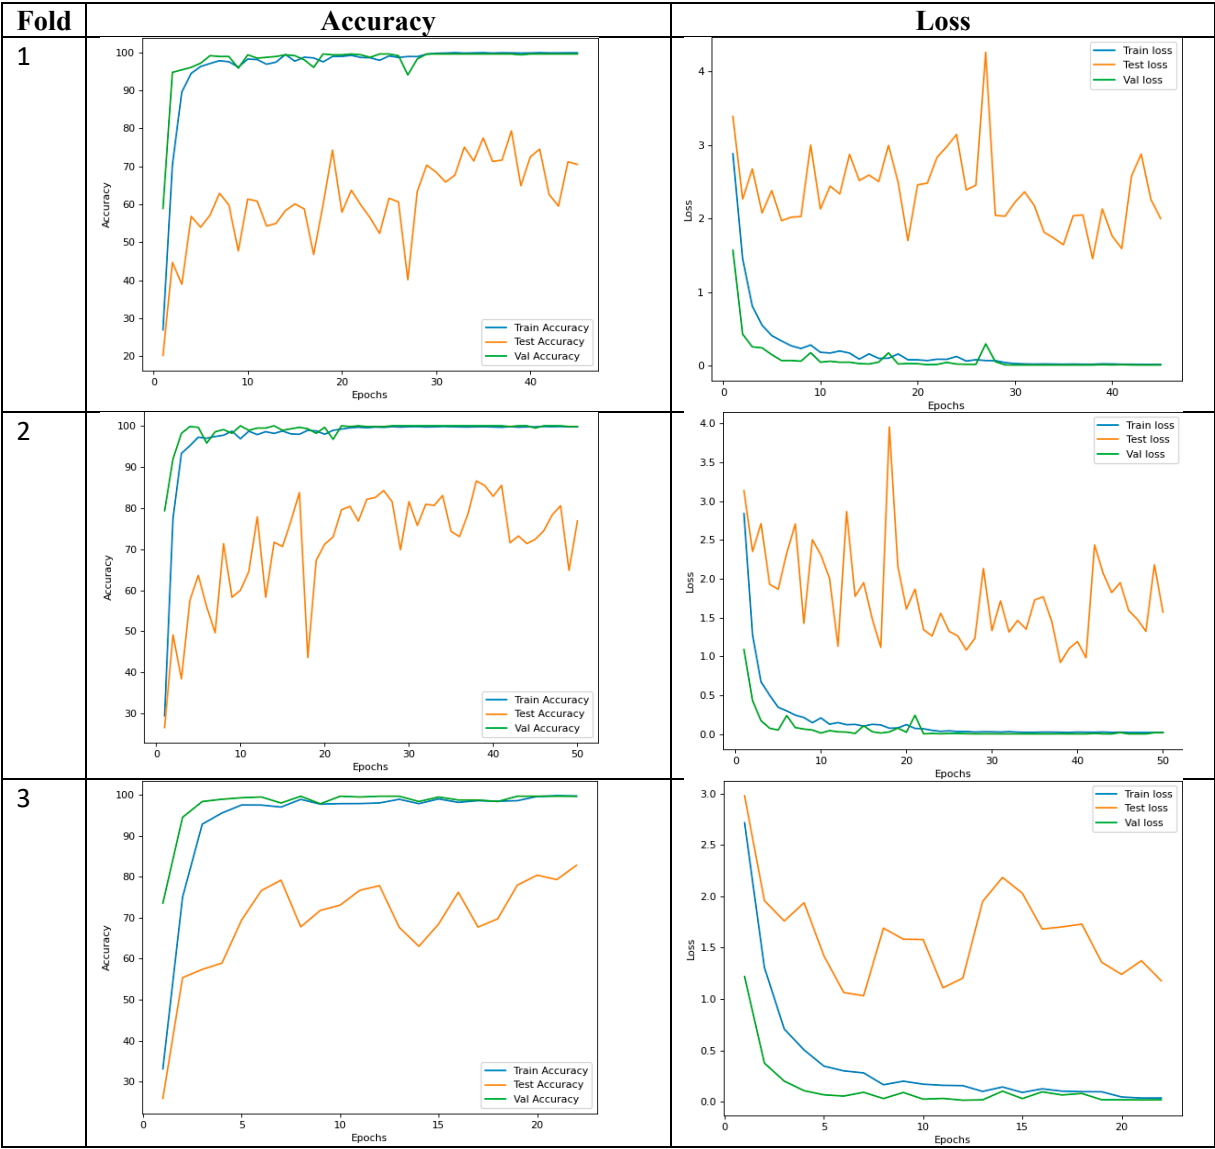

4

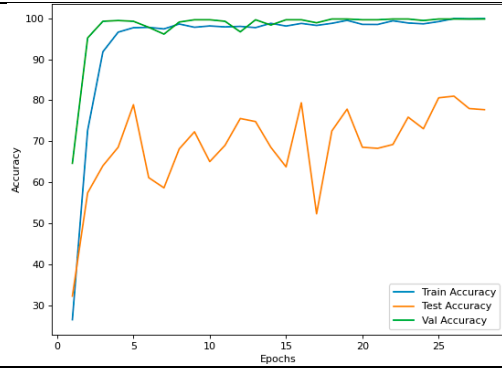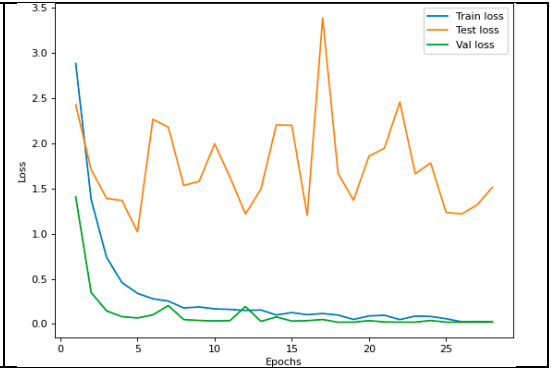

**Confusion Matrix:** The Confusion Matrix of ResNet18-LSTM-SelfMLP(q1) on Segmented Dataset is given below:

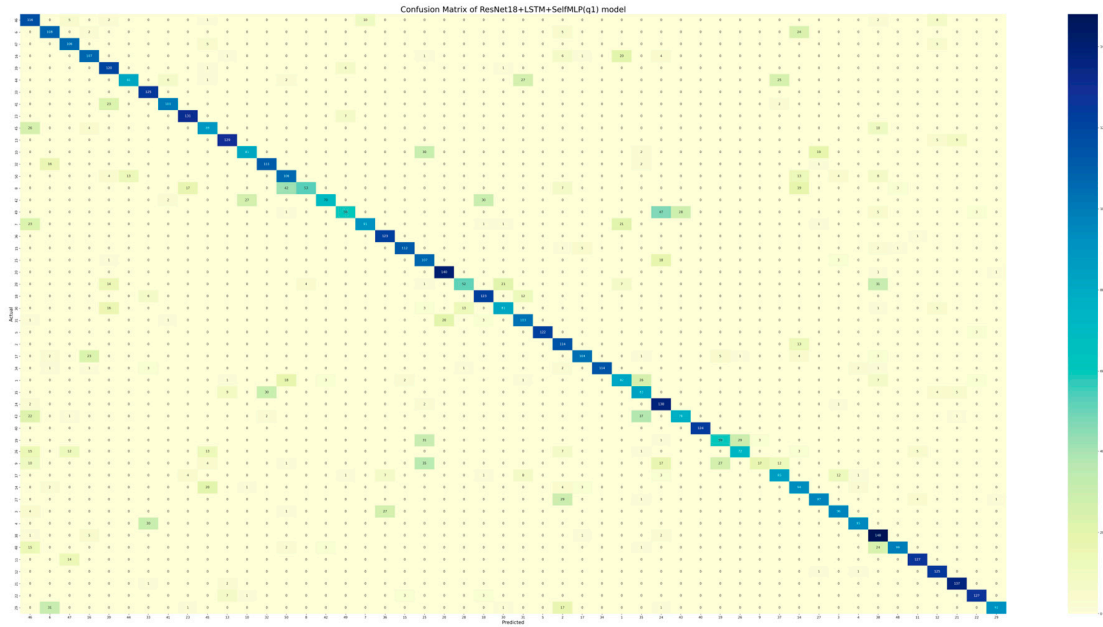

Figure S19: Confusion Matrix of ResNet18-LSTM-SelfMLP(q1) on Segmented Dataset

**ROC Curve:** The ROC Curve of ResNet18-LSTM-SelfMLP(q1) on Segmented Dataset is given below:

## ROC curve of ResNet18-LSTM-SelfMLP(q1)

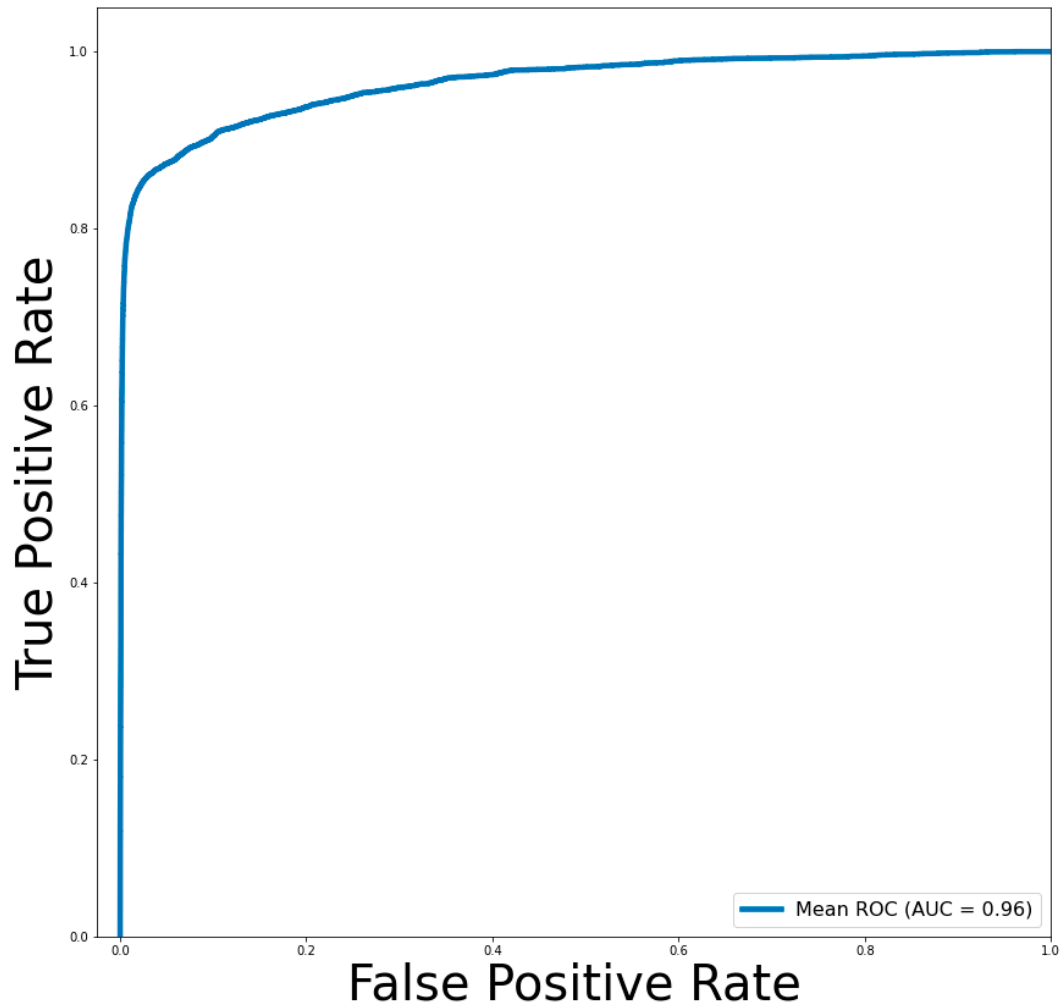

*Figure S20: ROC Curve of ResNet18-LSTM-SelfMLP(q1) on Segmented Dataset*



Model: ResNet18-LSTM-SelfMLP(q3) on Segmented Dataset

The accuracy and loss curves during the training of **ResNet18-LSTM-SelfMLP(q3)** on Segmented Dataset is given Table S11:

Table S11: Accuracy and Loss curves of ResNet18-LSTM-SelfMLP(q3) training

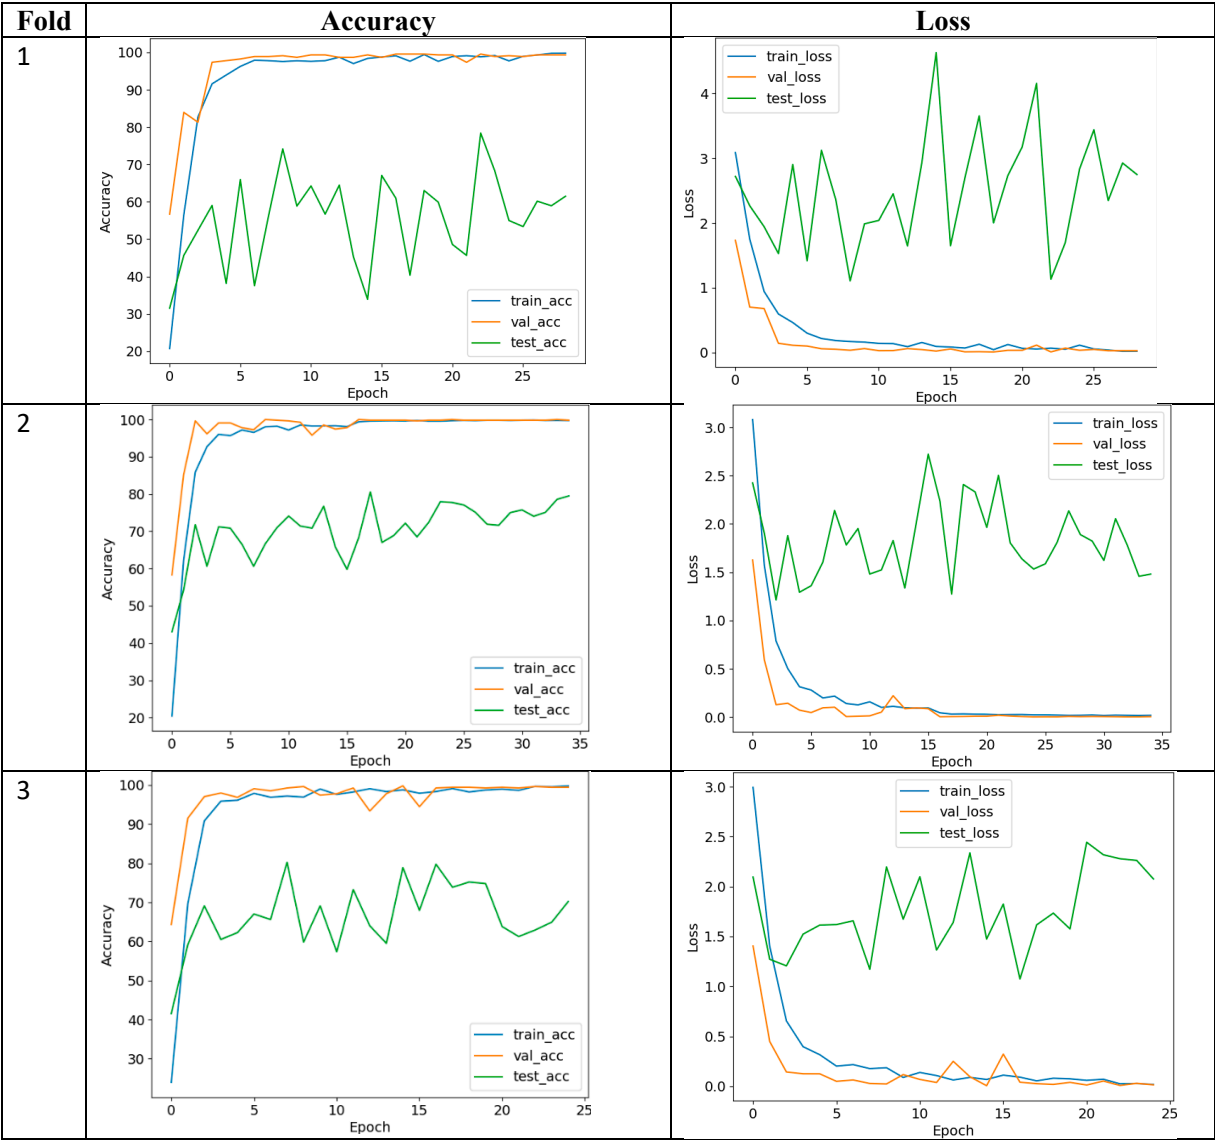

4

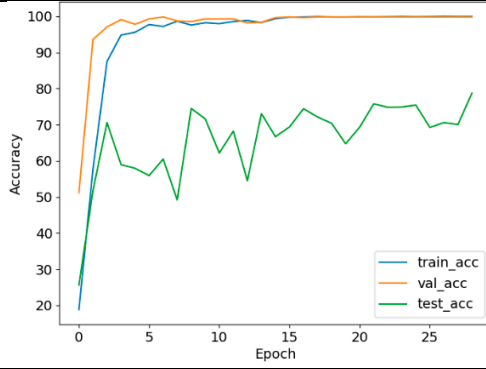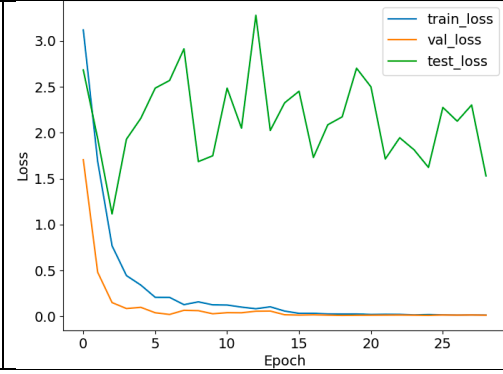

**Confusion Matrix:** The Confusion Matrix of ResNet18-LSTM-SelfMLP(q3) on Segmented Dataset is given below:

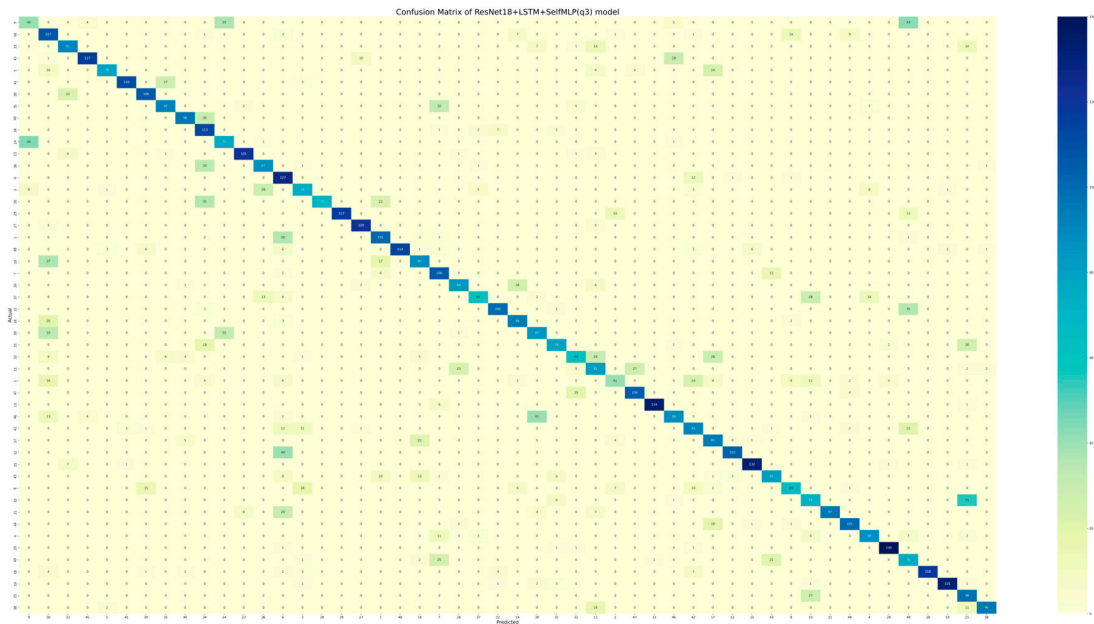

Figure S21: Confusion Matrix of ResNet18-LSTM-SelfMLP(q3) on Segmented Dataset

**ROC Curve:** The ROC Curve of ResNet18-LSTM-SelfMLP(q3) on Segmented Dataset is given below:

## ROC curve of ResNet18-LSTM-SelfMLP(q3)

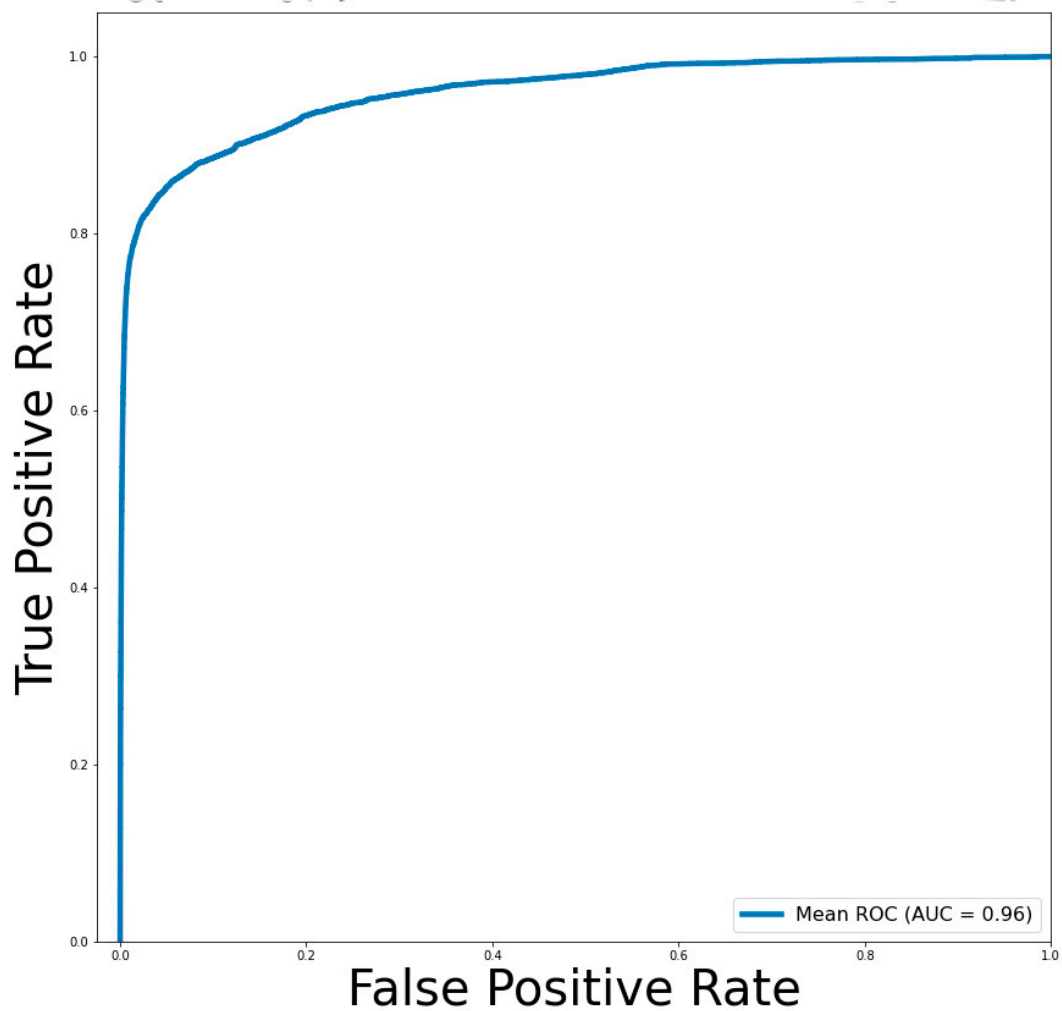

*Figure S22: ROC Curve of ResNet18-LSTM-SelfMLP(q3) on Segmented Dataset*

Model: ResNet18-LSTM-SelfMLP(q5) on Segmented Dataset

The accuracy and loss curves during the training of **ResNet18-LSTM-SelfMLP(q5)** on Segmented Dataset is given Table S12:

Table S22: Accuracy and Loss curves of ResNet18-LSTM-SelfMLP(q5) training

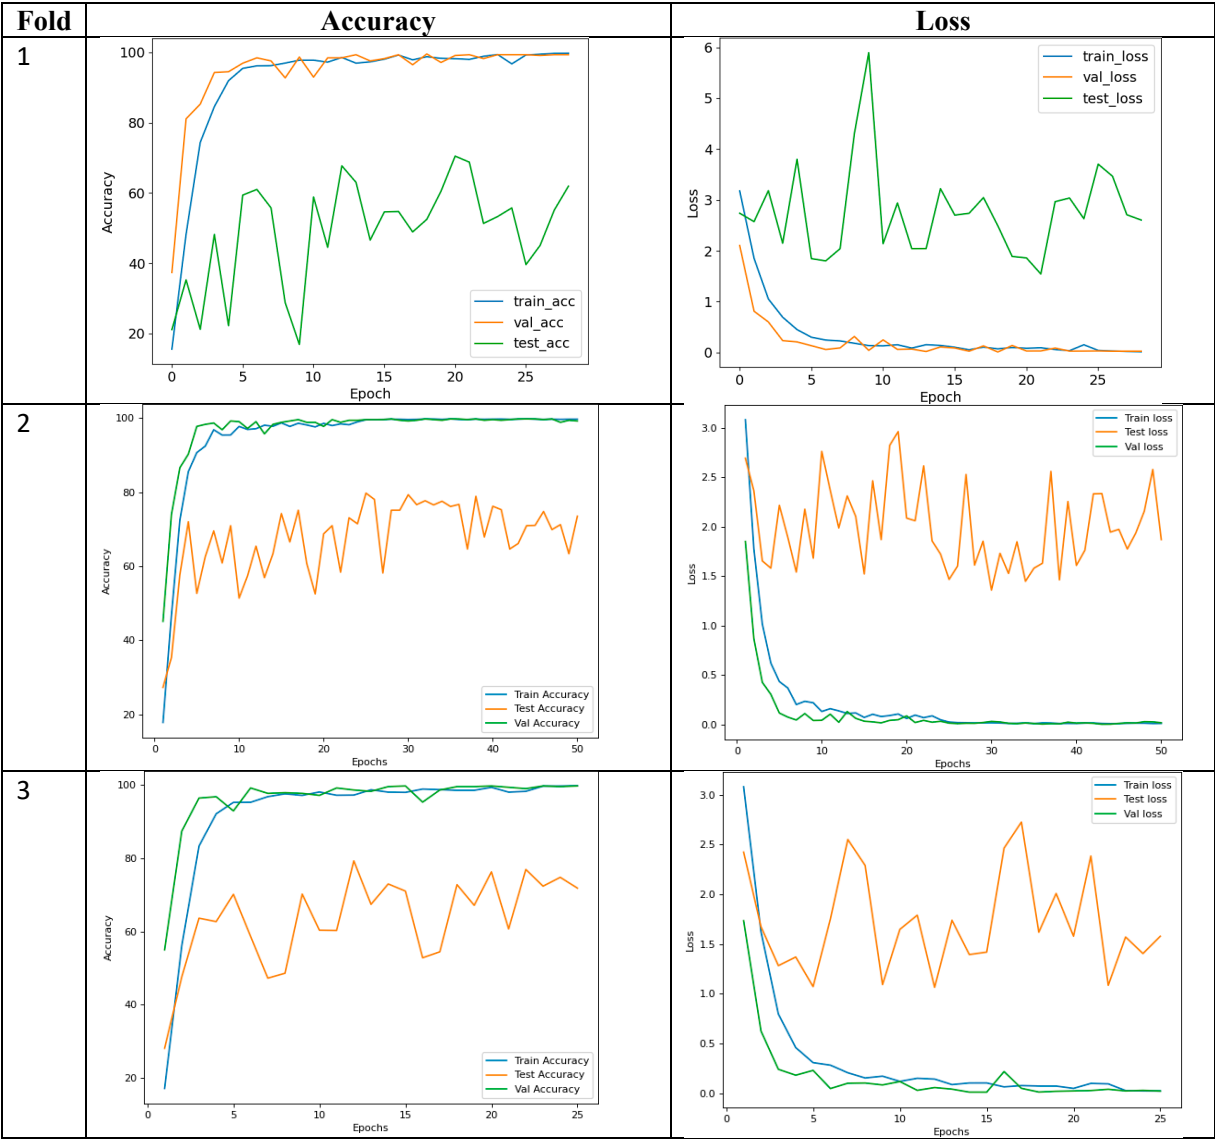

4

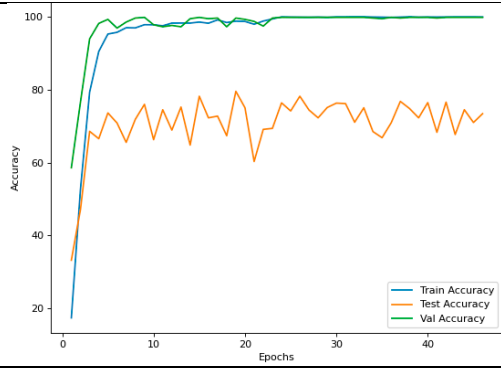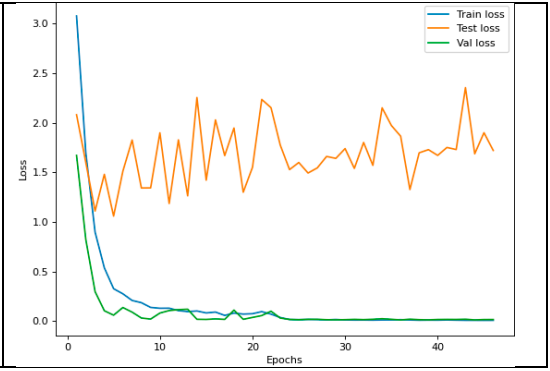

**Confusion Matrix:** The Confusion Matrix of ResNet18-LSTM-SelfMLP(q5) on Segmented Dataset is given below:

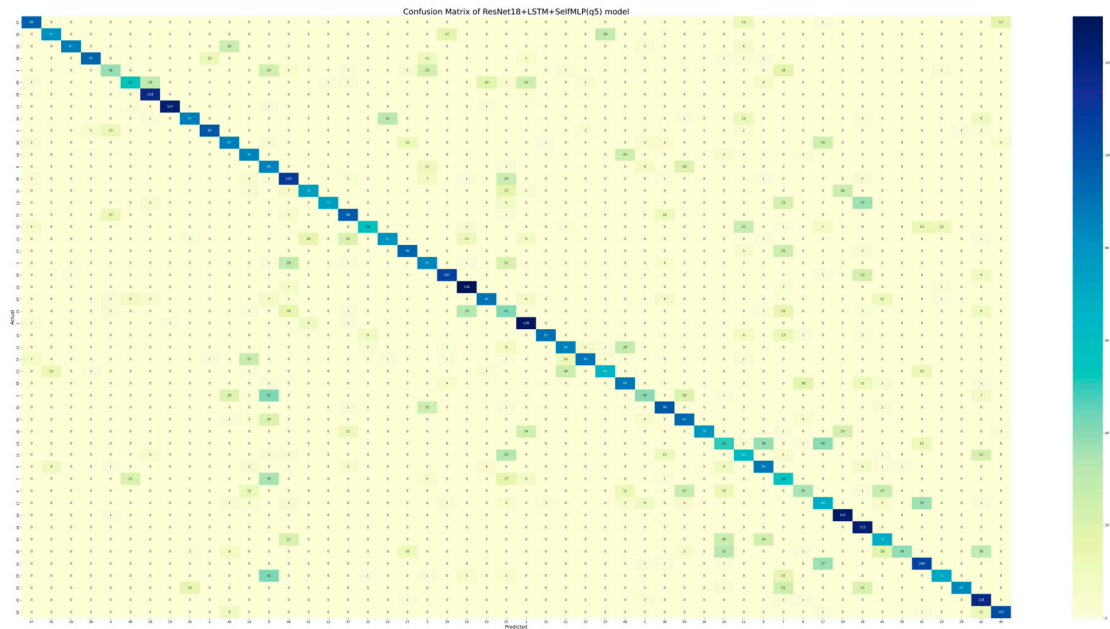

Figure S23: Confusion Matrix of ResNet18-LSTM-SelfMLP(q5) on Segmented Dataset

**ROC Curve:** The ROC Curve of ResNet18-LSTM-SelfMLP(q5) on Segmented Dataset is given below:

## ROC curves of ResNet18-LSTM-SelfMLP(q5)

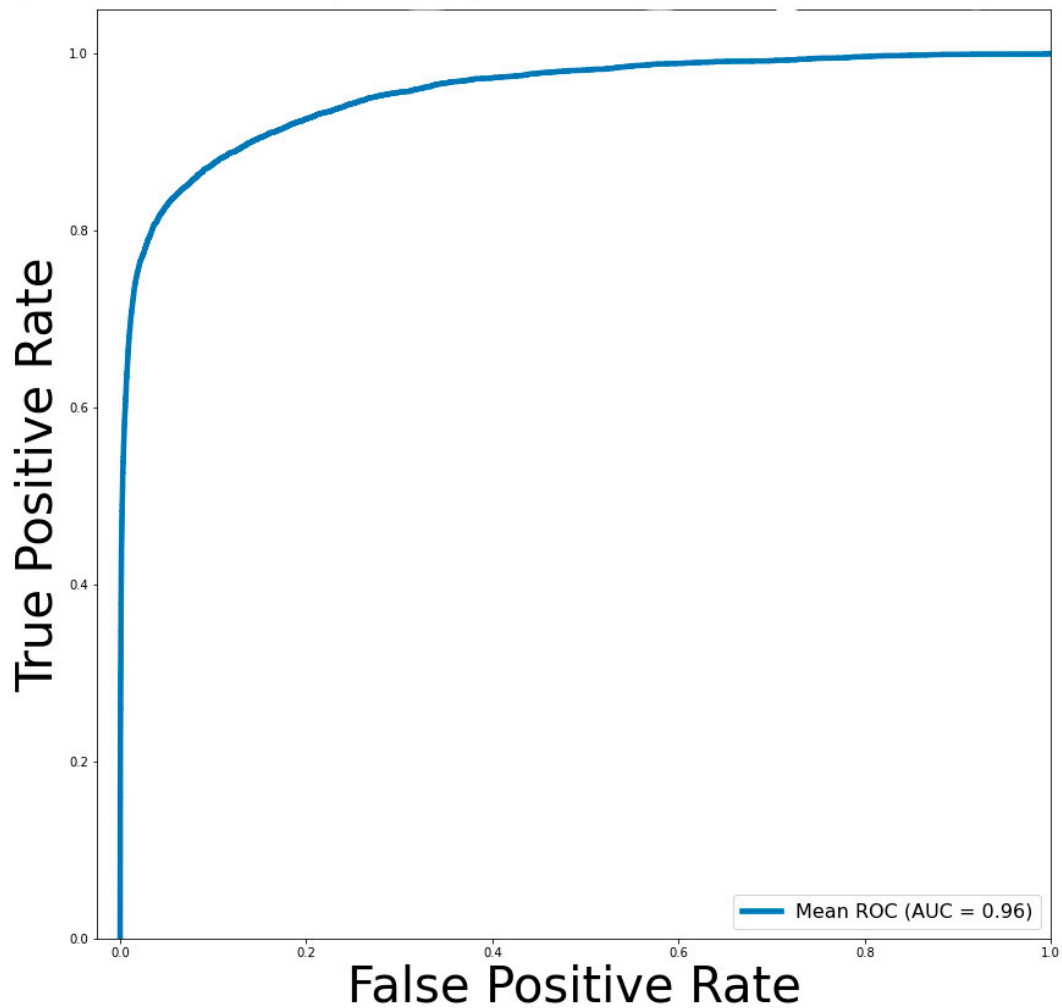

*Figure S24: ROC Curve of ResNet18-LSTM-SelfMLP(q5) on Segmented Dataset*
